1 **The last battle of Anne of Brittany: solving mass grave through an**  
2 **interdisciplinary approach (paleopathology, anthropobiology, history,**  
3 **multiple isotopes and radiocarbon dating)**

4 Rozenn Colleter<sup>1,2,\*,\dagger</sup>, Clément Bataille<sup>3,4,\*,\dagger</sup>, Henri Dabernat<sup>2</sup>, Daniel Pichot<sup>5</sup>, Philippe Hamon<sup>5</sup>,  
5 Sylvie Duchesne<sup>1,2</sup>, Françoise Labaune-Jean<sup>1,6</sup>, Stéphane Jean<sup>1</sup>, Gaétan Le Cloirec<sup>1,6</sup>, Stefania  
6 Milano<sup>7</sup>, Manuel Trost<sup>7</sup>, Sven Steinbrenner<sup>7</sup>, Marine Marchal<sup>2</sup>, Céline Guilbeau-Frugier<sup>8,9,10</sup>,  
7 Norbert Telmon<sup>2,9</sup>, Éric Crubézy<sup>2</sup>, Klervia Jaouen<sup>7,11,\*,\dagger</sup>

8

9 **Affiliations:**

10 <sup>1</sup> INRAP (Institut National de Recherches Archéologiques Préventives), 37 rue du Bignon,  
11 Cesson-Sévigné, France.

12 <sup>2</sup> CNRS, CAGT, UMR 5288, Université Paul Sabatier, 37 allées Jules Guesde, Toulouse, France.

13 <sup>3</sup> Department of Earth and Environmental Sciences, University of Ottawa, Ottawa, Canada.

14 <sup>4</sup> Department of Biology, University of Ottawa, Ottawa, Canada.

15 <sup>5</sup> Tempora, Université Rennes 2, France;

16 <sup>6</sup> CNRS, CReAAH, UMR 6566, Rennes, France;

17 <sup>7</sup> Max Planck Institute for Evolutionary Anthropology, Department of Human Evolution,  
18 Deutscher Platz 6, Leipzig, Germany;

19 <sup>8</sup> I2MC, Université de Toulouse, INSERM U1048, I2MC, 1, Avenue Jean Poulhès—BP84225,  
20 31432 Toulouse, France;

21 <sup>9</sup> Department of Forensic Medicine, Centre Hospitalier Universitaire de Toulouse, Université de  
22 Toulouse, Toulouse, France;

23 <sup>10</sup> CMEAB, Faculté de Médecine Ranguel, Université de Toulouse, Toulouse, France;

24 <sup>11</sup> CNRS, GET UMR 5563, Observatoire Midi Pyrénées, 14 rue Édouard Belin, Toulouse, France

25

26 \* Corresponding author. Email: [rozenn.colleter@inrap.fr](mailto:rozenn.colleter@inrap.fr);

27 [cbataill@uottawa.ca](mailto:cbataill@uottawa.ca); [klervia.jaouen@get.omp.eu](mailto:klervia.jaouen@get.omp.eu); † These authors contributed equally to this

28 work.

29

30

31 **Key words: medieval archaeology, paleopathology, stable isotopes, mass graves, physical**  
32 **anthropology, migration**

33

34 **Abstract:** Mass graves are usually key historical markers with strong incentive for archeological  
35 investigations. The identification of individuals buried in mass graves has long benefitted from  
36 traditional historical, archaeological, anthropological and paleopathological techniques. The  
37 addition of novel methods including genetic, genomic and isotopic geochemistry have renewed  
38 interest in solving unidentified mass graves. In this study, we demonstrate that the combined use  
39 of these techniques allows the identification of the individuals found in two Breton historical mass  
40 graves, where one method alone would not have revealed the importance of this discovery. The  
41 skeletons likely belong to soldiers from the two enemy armies who fought during a major event of  
42 Breton history: the siege of Rennes in 1491, which ended by the wedding of the Duchess of  
43 Brittany with the King of France and signaled the end of the independence of the region. Our study  
44 highlights the value of interdisciplinary approaches with a particular emphasis on increasingly  
45 accurate isotopic markers. The development of the sulfur isoscape and testing of the triple isotope  
46 geographic assignment are detailed in a companion paper [1].

47

48

## 49 **Introduction**

50 While mass graves are often key historical and sociological markers, with strong incentive for  
51 archeological and/or forensic investigations, little historical records usually accompany the hasty  
52 burial of corpses. Existing historical records associated with mass burials are often biased: as the  
53 Churchillian adage goes, “History is always written by the victors”. In addition, those records  
54 usually document the life of the leaders and not that of the physical actors of the battles. The  
55 identification of individuals buried in mass graves has therefore long benefitted from

56 archaeological [2–4], anthropological [5–8], genomic [9–11] and isotopic geochemistry analyses  
57 [12,13]. These analyses may specify the context and causes of death (wars, epidemics) but without  
58 artefacts in war mass graves, the camps of the buried remain unknown. Isotope ratios of elements  
59 incorporated at different life periods in mineralized tissue (bones and teeth) of an individual are  
60 likely to document geographical provenance. Here, we demonstrate, for the first time, that the  
61 combined use anthropological, pathological, historical and isotopic data, coupled with advanced  
62 isotopic models [1,14,15] and existing genetic information [16], can uncover the identity of human  
63 remains found in two Breton mass graves while one of those methods alone would have failed to  
64 reconstruct their story.

65 Stable isotope geochemistry has become a popular and effective tool to investigate the diet,  
66 childhood or adolescence origin and mobility of buried individuals [17–25]. Nitrogen and carbon  
67 isotope compositions ( $\delta^{15}\text{N}$  and  $\delta^{13}\text{C}$ , respectively) can reveal key insights into the diet of unknown  
68 individuals buried in mass graves, which can be sometimes linked to their social status [26,27].  
69 Oxygen (O) and strontium (Sr) isotopes have been applied to many archeological studies to  
70 determine geographical provenance of recovered human remains or artifacts [12,28–39]. These  
71 provenance applications rely on the natural and predictable spatial variability of O isotope  
72 composition ( $\delta^{18}\text{O}$ ) and Sr isotope ratio ( $^{87}\text{Sr}/^{86}\text{Sr}$ ) with climate and geological variables,  
73 respectively. Advances in  $^{87}\text{Sr}/^{86}\text{Sr}$  isoscapes have made it possible to use this isotopic system in  
74 combination with  $\delta^{18}\text{O}$  values in dual isotopes probabilistic geographic assignments [40]. Both  
75 isotope systems are generally analyzed in dental enamel, and therefore reveal information on the  
76 early life of the individual studied. Sulfur (S) isotopes are another isotopic system that can provide  
77 additional independent information to assess the provenance of unknown individuals. The S  
78 isotope composition ( $\delta^{34}\text{S}$ ) are known to vary on the landscape with the distance to the coast. We

79 developed in association to the present study an isoscape predicting sulfur isotope composition  
80 ( $\delta^{34}\text{S}$ ) across the landscape to use them in multi-isotope probabilistic assignments with oxygen and  
81 strontium isotopes [1,34]. Sulfur isotopes are performed on the collagen contained in the dentine  
82 and the bones. In order to have information chronologically closer to that brought by Sr and O  
83 isotopes, the triple geographical assignments of our model have been based on dentine values, also  
84 revealing information of the childhood and adolescence of the individuals. Bones were also  
85 analyzed, and reflect the location of the individuals 10 to 20 years prior to their deaths.

86 Using an interdisciplinary approach, we investigate the human remains of two undocumented mass  
87 graves found in Rennes, Brittany (France). We argue that the exhumed skeletons were soldiers  
88 who perished during a major event of Breton history: the Siege of Rennes (1491) representing the  
89 last battle for the Duchy independency. This war represents the ultimate battle of the French-  
90 Breton war which involved many European forces (England, Spain and the Holy Roman Empire  
91 in addition to France and Brittany), and is famous in modern Brittany as it signified the end of the  
92 independence of the region. We demonstrate that one of the two graves is linked to the allies of  
93 the Duchess Anne of Brittany, whereas the other likely contains remains from members of the  
94 French Royal army. Our study sheds new light on this poorly described conflictual event and adds  
95 to the historical archive especially on the composition of armies, hitherto unknown. The results  
96 underline the power of interdisciplinary approaches to shed new lights on understudied conflicts  
97 or events, particularly those using multiple isotope tracers.

98

99

## 100 **Historical and archaeological contextualization**

### 101 *Historical background*

102 In the 15th century, the Breton population was estimated at more than one million inhabitants with  
103 Nantes (14,000 inhabitants), Rennes (13,000) and Vannes (13,000) being the main cities [41]. At  
104 the time, the relative political stability of the Duchy corresponded to a period of prosperity. This  
105 stability is illustrated by the construction of many religious buildings, such as the convent of the  
106 Jacobins de Rennes [42] and aristocratic manor houses. The city's walls were also extended  
107 between 1421 and 1476 [43]. This prosperity is partly due to the policy of the Montfort family  
108 who held the duchy and tried to create a princely state independent of the kingdom. By staying as  
109 far away from the Hundred Years' War as possible, the Dukes promoted peace to a certain extent  
110 and economic development based on the development of canvas making and maritime trade.

111

### 112 *The war of Brittany and the siege of Rennes in 1491*

113 The re-establishment of the Kingdom of France after the Hundred Years' war and the French royal  
114 will to impose the liege homage to the Breton Duke triggered a less favorable context for the  
115 Duchy of Brittany. The end of the 15th century was thus characterized by a disastrous situation  
116 between new war events and their financial and diplomatic consequences as well as new plague  
117 episodes. Several reasons led to the conflict against the King of France Louis XI: (i) the restoration  
118 of royal power and its willingness to impose itself on Brittany; (ii) divisions within the Breton  
119 nobility and (iii) a ducal policy of support for certain revolts against the King of France. Moreover,  
120 Duke Francis II, from the Montfort dynasty, had no male heir. According to the treaty of Guérande,  
121 at the end of the Breton succession war (1356), the throne should then pass to the Penthièvre

122 dynasty. The new King of France, Charles VIII, son of Louis XI, bought the succession rights to  
123 a Penthièvre comtess and claims Brittany whereas the Duke Francis II formalized the position of  
124 his daughters as legitimate heiresses with the support of the Estates of Brittany. Tension arose and  
125 war broke out in 1487. The Royal Army invaded Upper Brittany, controlled several cities and  
126 crushed the Ducal Army at Saint-Aubin-du-Cormier on 28 July 1488 [44,45]. Then, the Orchard  
127 Treaty put an end to the policy of independence of the duchy and stipulated that the two daughters  
128 of Duke Francis II (Anne and Isabeau) could not marry without the King's approval. Nevertheless,  
129 other rulers such as Henry VII of England or Ferdinand of Aragon opposed this decision and  
130 supported Duchess Anne (**Fig. 1A**). When her father died, Anne ascended to the ducal throne at  
131 the age of less than 12 years under difficult conditions. At the end of 1490, she married by proxy  
132 - without the authorization of Charles VIII – in order to obtain an ally: Maximilian of Habsburg  
133 (**Fig. 1A**). He was the contender for control of the Holy Roman Empire and was at war with the  
134 King of France. The latter, opposed to this marriage, brought his army into the duchy. Anne  
135 received only limited military assistance from her allies and husband. In addition, the captain of  
136 her army, Alain d'Albret, turned his cloak after she wed Maximilian of Hasburg instead of him. In  
137 1491, he used the English soldiers sent by Henry VII to attack the German mercenaries sent by  
138 Maximilian of Austria. Anne de Bretagne fought back using the Spanish men sent by Ferdinand  
139 of Aragon [46]. A large part of the duchy is occupied by the royal army led by Louis de la Trémoille  
140 which came to besiege the duchess in 1491, entrenched with the remains of her army in the city of  
141 Rennes. The Duchess Anne was then forced to accept a marriage with the King of France by a  
142 peace treaty signed at the Jacobins convent of Rennes. From 1532 onwards, the Duchy of Brittany  
143 became a French province, entering the royal domain while retaining autonomy with provincial  
144 states and then its own Parliament and important privileges, particularly fiscal.

145

146

147 **Figure 1. Location of the site.** **A.** Situation in Europe in 1491 and the warring parties involved; **B.** Location  
148 of the Jacobins convent outside the walls of the city of Rennes.

149

### 150 *The armies involved*

151 Archival sources are patchy on this wartime episode and the studies begun on the state of the forces  
152 involved focus more on the 1487-88 campaign and the battle of Saint-Aubin-du-Cormier than on  
153 the siege of Rennes. In the 15th century, the Breton army was reorganized by the Dukes. Under  
154 Francis II, it initially included a very small number of ducal guards and “Compagnie  
155 d’ordonnance” composed of several types of combatants. The whole is based on a heavy cavalry,  
156 accompanied by archers, coutiliers and others, forming a small paid army which will develop over  
157 the years. In addition, various troops from the feudal service with mismatched combat skills joined  
158 the professional army. In 1480, the Duke reformed the Franc-archers (Free Archers), a militia  
159 which had been created in 1425 in the Breton parishes. This reorganization aims at improving their  
160 fighting skills. Finally, the list of the Breton combatants also includes the mercenaries, who were  
161 sent by allies (e.g., Maximilian, Henry the VII, Ferdinand of Aragon) and recruited by the Breton  
162 army. The theoretical number of soldiers would be 11,300, but historiographer A. Bouchart  
163 suggests there were more than 18,000 men [45]. In any case, the army was decimated in Saint-  
164 Aubin (6,000 deaths on the Breton camp). Consequently, the troop around the duchess Anne during  
165 the siege of Rennes was very small. The Breton army was supported by the Rennes militia and by  
166 a corps of German mercenaries (Landsknecht) sent by Maximilian [47]. English and Spanish



167 mercenaries might also have been sent by Henry the VII and Ferdinand of Aragon [48,49]. The  
168 defense also likely included trained artillery, a crucial resource for the defense of the city.

169 In contrast to the Breton camp, the royal army commanded by La Trémoille was modernized under  
170 the leadership of Charles VII and his successors. The heart of the army was formed by the  
171 “Compagnie d'ordonnance” of 600 men on horseback whose members were paid, which is an  
172 indication of the fighting skills of these individuals. In addition to this company, the King of France  
173 called in his Banners. The army also included Franc-archers, mercenaries, and a powerful artillery.  
174 The troops involved in the battle of Saint-Aubin du Cormier in 1487 reportedly numbered about  
175 13,500 men [45].

176

### 177 *The Jacobins convent*

178 The Jacobins convent is an emblematic place in the city of Rennes, capital of Brittany, at the  
179 western end of Europe (**Fig. 1A**). This community of Dominicans was founded in 1368 by a  
180 bourgeois from Rennes but very quickly this foundation was taken over by the Duke Jean IV de  
181 Montfort, which undoubtedly contributed to its influence [42,50]. The convent became a major  
182 burial place for the aristocracy of the city but also a local pilgrimage center. Pilgrims used to come  
183 to a chapel to pray in front of an icon of the Virgin Mary, “Notre Dame de Bonne Nouvelle” (Our  
184 Lady of Good News). The Jacobin convent is located on the west of the Sainte Anne square. At its  
185 creation, it was within the parish of Saint-Aubin, outside of the city walls (**Fig. 1B**). The exact  
186 configuration of the site during the siege of Rennes remains unknown because, while the church  
187 had already been built, the convent buildings (refectory, chapter house, cloister, etc.) were largely  
188 renewed in the 17th century [42]. The convent remained under the control of the ducal troops

189 during the siege likely because it was too close to the walls and a city gate (the Foulon's Gate) to  
190 host a royal garrison. Perhaps it also had a strong defense, though archives and archeological  
191 findings cannot answer this question. Among the mendicant establishments, the Jacobins convent  
192 of Rennes in Brittany appears to be a relatively late foundation (1368) for a major order [50].

193

## 194 **Material**

### 195 *Sample size*

196 The Jacobins convent was the subject of an entire preventive excavation by the National Institute  
197 for Preventive Archeology Research (Inrap) between 2011 to 2013. This excavation of the  
198 archaeological site, as well as its study was authorized by order of the prefect (n°35/2011-011).  
199 Two burial periods contemporary of the convent (late 14th/16th and 17th/18th centuries) have been  
200 identified. Here, the mass graves investigated are exclusively related to the first phase for which  
201 137 individuals were collected (136 skeletons and 1 cardiograph). Different funeral spaces are  
202 individualized (**Fig. 2**). The majority of the tombs from the first phase are located outside of the  
203 convent (95/137 or 69%): 64 in the western cemetery and 31 in the cloister garden. Fourteen  
204 individuals come from the chapter house, located in the east wing of the convent, 11 from the  
205 cloister galleries (3 from the northern and 8 southern galleries), 7 from the church choir, 1 from its  
206 adjoining chapel and 8 from the church nave. A lead cardiograph was also found in a secondary  
207 position in the church choir with an inscription dated July 1584 [51]. The funeral recruitment for  
208 this phase presents a selection of individuals according to the age of death: 115 adults (of whom  
209 74% are male and 26% female) and 22 children (**SI Text section Physical anthropology**). The  
210 individuals between birth and four years of age are under-represented, unlike adults who died

211 between 20 and 59 years of age. The number of men is also too large compared to women for  
212 normal mortality (highly significant difference with  $p = 0.0008958$ ; chi-squared test, also written  
213 as  $\chi^2$  test = 11.031).

214 The two mass graves come from outside the convent (**Fig. 2**). One includes 4 individuals (Gr. 322)  
215 and the other at least 28 (Gr. 337). The first tomb was damaged by landscaping work and the  
216 construction of a wall, destroying the individuals' lower limbs. The other pit, a kind of rectangular  
217 trench, was only partially dug because of the constraints of the excavation, but at least three-  
218 quarters of which was excavated based on additional selected drilling. Gr. 337 was filled with  
219 sediment including many terracotta elements, shale blocks and some fauna bones after the funeral  
220 depot. The filling partially destroyed parts of an old street in the Roman city. Later, the tomb was  
221 disturbed by the installation of a wellbore in its western part, intersecting the upper part of many  
222 skeletons. The sepulchral pit was excavated over a length of 2.60 m, with a maximum extension,  
223 after drilling, estimated at 3 m. Twenty-eight individuals in primary position are identified but the  
224 overall estimate is 32 or even 35 individuals.

225

226 **Figure 2. Distribution of burials** according to their location (points) and density (heatmap) in the Jacobin  
227 convent from the late 14th to the 16th century; photos of archaeological excavation of the mass Gr. 322 and  
228 337.

229

### 230 *Sampling strategy, buried individuals*

231 The location of the tomb within the convent buildings served as a basis for assessing social groups  
232 of the deceased (cemetery vs. church for the French historian Michel Vovelle [52]). Indeed, it is  
233 the proximity to certain architectural elements that is important in Christian burial tradition

234 [53,54]. Individuals buried inside the convent -choir and nave of the convent church and chapels-  
235 are considered to have a privileged status. According to historical sources [55], those coming from  
236 the Chapter house would probably be clergymen (Dominican friars). All these individuals are  
237 grouped in Group **I** (Inside) and represent 31% of the total number of individuals studied (42/137).  
238 Forty-two individuals (41 skeletons and 1 cardiotaph) were counted. A second group, less favored  
239 than Group **I**, comes exclusively from the surroundings of the convent. These individuals are  
240 grouped in Group **O** (outside) which represents 46% of the numbers of individuals studied  
241 (63/137). The two mass graves, found outside the convent, are individualized in the study in a  
242 “**Mass Grave**” group.

243 In the absence of dated artefacts, we sent two samples for radiocarbon dating through Accelerator  
244 Mass Spectrometry using a selection of human remains from each tomb. We used a fragment of  
245 forearm from subject 20183 (Gr. 322) and from the clavicle of 20769 (Gr. 337). The samples have  
246 been analyzed by the company Beta Analytical, Floride, USA. The collagen was extracted with  
247 alkali by the company in 2015-2016 (**SI Text section Datation**).

248 For the isotopic analysis, we selected the bones of the individuals of the sepulture Gr. 322 (4/4)  
249 and Gr. 337 (22/28), and one tooth for each individual with cranial remains (4 teeth for the Gr.  
250 322, 6 teeth for the Gr. 337). All the teeth were sampled for O and Sr isotope analyses, and the  
251 tooth root was also sampled for C, N, S isotope analyses. Oxygen, strontium and sulfur isotope  
252 analyses are described in our associated article [1]. The associated local fauna recovered in the  
253 grave and previously studied by Jaouen et al. [26] were also sampled. We also added two local  
254 individuals (Louise de Quengo and Louis du Plessis from the 17th c. [56,57]), since no oxygen  
255 isotope analyses were previously performed on humans for this site.

256

## 257 **Methods**

### 258 *Physical anthropology and funeral practices methods*

259 The sex determination was made from observations [58] and measurements made in the pelvis  
260 (i.e., Probabilistic Sex Diagnosis in French [59]). Age at death was estimated for adults from  
261 observations of the sacropelvic surface [60] and that of adolescents and sub-adults from the stages  
262 of tooth eruption [61,62] and bone maturation [63,64]. The statures were calculated according to  
263 Ruff's equations [65] from measurements of the maximum lengths of the femurs and humerus.  
264 They follow a normal Law (Shapiro-Wilk test,  $W = 0.9910$ ). An ANOVA and Tukey tests were  
265 calculated to determine significant relationships between groups.

266 The determination of funeral practices is based on archeo-thanatological observations in the field  
267 [66]. The preservation or not of all anatomical connections, the observation of any preserved  
268 volumes, the unstable balances or linear effects on human skeletons, all provide information about  
269 the burial method and funeral architecture.

270

### 271 *Lesions and paleopathological methods*

272 The paleopathological study was carried out on the basis of a classical macroscopic bone  
273 examination through the identification of lesions and their possible interpretations. The list of  
274 lesions includes trauma, specific and non-specific infections, non-specific stress markers,  
275 congenital anomalies and malformations, osteoarthritis lesions and other inflammatory or  
276 degenerative diseases, as well as entheses' changes (i.e., evidences which cannot be linked to a  
277 specific activity) [67–72]. In the case of multiple burials, the location of the trauma was compared

278 with that of the organs, serous and soft tissues (arteries, veins, peripheral nerves, muscles, tendons,  
279 ligaments, etc.) in order to assess the consequences of the injuries.

280 Some of the identified bone lesions were observed under an epifluorescence microscope using the  
281 protocol of Capuani et al. [73] The epifluorescence macroscopy combines the advantages of  
282 macroscopy (large workspaces, large working distances and accurate reproduction) with high-  
283 resolution fluorescence technology. The function of the epifluorescence microscope is to irradiate  
284 the sample with a desired range of wavelengths and then separate the fluorescent light emitted  
285 from the excitation light. Incident light is produced by the passage of source light through an  
286 excitation filter, which selects the wavelengths of interest. The wavelengths transmitted by the  
287 excitation filter are deflected by a dichroic mirror and pass through the lens to the sample, which  
288 is therefore illuminated from above. The light emitted by fluorescence is collected by the lens. It  
289 then passes through the dichroic mirror and an emission filter that blocks the excitation  
290 wavelengths reflected by the sample, and reaches the eye or camera. The excitation filter, dichroic  
291 mirror and emission filter are assembled in a cube. Several interchangeable cubes are arranged in  
292 a rotating turret, the filters and mirror being adapted to the fluorescent body to be analyzed.

293 The description of the wound marks was standardized to facilitate their interpretation: a stab  
294 wound with a knife consists of i) two walls (parts of the bone in contact with the blade); ii) two  
295 banks (meeting lines between the wall and healthy tissue); iii) two profiles (cutting planes of the  
296 lesional groove) and iv) a bottom (deepest area of the notch) (**SI Text section Lesions and  
297 paleopathological data**; fig. S6). Bone debris resulting from the passing of a blade and the  
298 destruction of the bone might be present in different areas of the notch. A “*rattail*” appearance  
299 indicating where the blade left the bone is an indication of the end of a lesion.

300

301 *Isotope analyses*

302 Part of the isotope analyses have been performed in two previous publications on the Jacobin  
303 convent [26,74] as well as the associated publication [1] for the local fauna and humans. For C and  
304 N isotopes, 7/26 individuals were first published in Colleter et al. [74], and we here analyze the  
305 rest (20/26) of the individuals. Sr isotope ratios of teeth were previously published for 3/10  
306 individuals, and we here analyze the 6 other individuals. All the oxygen isotope data (10/10) on  
307 the teeth are from this study.

308

309 Tooth and bone cleaning and sampling for C, N, S isotope analyses of the collagen were performed  
310 using the protocol previously described in Colleter et al. [26,74]. The collagen was extracted using  
311 the protocol of Talamo and Richards [75] and the C/N isotopes were analyzed using a Delta 5 EA-  
312 IRMS. Standards were analyzed along with the samples and they showed expected ratios (table  
313 S9).

314 Sulfur, oxygen and strontium isotope analyses were conducted in the frame of our associated  
315 publication for the local individuals [1]. For the individuals of the two mass graves, we conducted  
316 the exact same analyses and methods. Among the 28 individuals of this Gr. 337, we conducted  
317 isotope analyses for 6 teeth and 22 bones belonging to 23 different individuals. For sulfur isotopes,  
318 16/22 of the human bone data and 3/6 human tooth data are from this study, and the rest was  
319 published in Colleter et al. [74]. For the Gr. 322 and 337, 7/10 Sr isotope analyses were already  
320 published in Jaouen et al. [26]. The 3/10 additional Sr isotope data are from this study. All oxygen  
321 and carbon enamel isotope data (10/10) are from this study. Eight mg of the remaining collagen  
322 extracted for C and N isotope analyses was sent to Isoanalytical for S isotope analyses by EA-

323 IRMS. Dental enamel was first mechanically cleaned prior to sampling for Sr, O and C isotope  
324 analyses. The strontium was extracted using a modified protocol from Deniel and Pin [76] in the  
325 clean lab facility of the Max Planck Institute for Evolutionary Anthropology. They were then  
326 analyzed at the Max Planck Institute and the University of Calgary using the Neptune MC-ICP-  
327 MS. For O and C isotope analyses of the tooth enamel, enamel powder (8mg) was sampled using  
328 a diamond drill for each tooth and sent to Iso-analytical LTd (UK) where oxygen and carbon  
329 isotopes analyses have been performed by CF-IRMS.

330 In our associated publication [1], we developed a sulfur isoscape, allowing for the first time to  
331 combine these three different isotope systems into probabilistic geographic assignments. We  
332 applied this model to the individuals of our two mass graves to establish their geographical origin.  
333 Details of the methods can be found in the above-mentioned article.

334

## 335 **Results**

### 336 *Anthropological and paleopathological results*

337 At the Jacobins' convent, individuals were buried either within the walls (Group I, for inside) or  
338 in the yards and cloister (Group O, for outside). The group I included 8 individuals under 20 years  
339 of age and 34 adults (as many men as women when sex is determined) and the group O counted  
340 52 adults (71% males and 29% females with a determined sex) and 11 individuals under 20 years  
341 of age (table 1). The Group I presents distortions compared to archaic mortality: (i) an over-  
342 representation of adults who died between 30 and 59 years of age and an under-represented of  
343 children under 4 years (fig. S1)



344 Among all the burials excavated contemporary of the convent, only two graves include more than  
345 two skeletons (**Fig. 2**). Twenty-nine adults and three individuals between 15 and 20 years old, all  
346 men, were counted in these two graves (table S1). The demographic profile clearly shows a  
347 significant selection of the buried persons (**SI Text section Physical anthropology**; fig. S1). The  
348 first grave (Gr. 322) is located in the middle of the outer western cemetery and contains four  
349 individuals buried simultaneously based on the skeleton's position in the pit (Fig. 2) [77,78]. The  
350 second one appears to be a kind of trench dug at the occidental part of the same funerary space and  
351 contains at least 28 individuals (Gr. 337). The first one does not necessarily constitute a mass grave  
352 *stricto sensu* since it only contains four individuals [79–81]. Nevertheless, the contemporaneity of  
353 the deposits clearly illustrates a brutal and morbid event [78].

354 Simultaneous to the particular recruitment of the grave (only men over 15), the existence of  
355 traumatic injuries observed on the skeletons argues for a soldiers' burial. The individuals are  
356 characterized by numerous perimortem lesions by sharp or spiked objects (**Fig. 3; SI Text section**  
357 **Lesions and paleopathology data**; figs. S7 and S8). Only the skeletons of the mass graves have  
358 unhealed lesions and wounds in the upper part of the body (skulls and upper limbs). Trauma  
359 sequelae are present on the skeletons of 2 individuals from the Gr. 322 (skeletons 20183 and  
360 20188) and 14 from mass Gr. 337 (fig. S8, S10 and table S4). For this last tomb, it should be noted  
361 that the best represented skeletons from the southern part of the pit almost all have lesions. Five  
362 skeletons of the Gr. 337 have healed traumatic lesions (fig. S9) without consequence on the death  
363 of individuals 11 individuals have trauma from spiked or sharp objects, with more or less  
364 secondary lethal consequences. Among those with lethal lesions, two individuals (20764 and  
365 20800) also show healed lesions that suggest a return to combat. For each individual in the Gr. 337  
366 and Gr. 322, we investigated what type of lesions can be observed on their bones, as well as their

367 location which can help to identify in what type of fight they were inflicted (riders, backstabbing,  
368 etc...). Detailed results are described in **SI Text section Lesions and paleopathology**. Seventeen  
369 unhealed blows which reached the bone are identified for the 28 individuals of the Gr. 337 (**Fig.**  
370 **3**). Some individuals, especially older ones, combine lethal injuries and healed ones (figs. S8, S9,  
371 S10 and table S4), which suggests that they regularly fought throughout their life [82,83]. This  
372 observation suggests that those individuals were professional soldiers or mercenaries. Observation  
373 of lesions by epifluorescence macroscopic suggests that the weapons causing the injuries were  
374 sabers or halberd (**SI Text section Lesions and paleopathology**). In the largest tomb (Gr. 337),  
375 the blows that impacted the lower limbs (ankles or thigh) were given from the bottom to the top,  
376 which evokes the will to dismount the horse riders (4/17) (table S4). On the other hand, the blows  
377 received on the backs of the victims (3/17) and their forearms (5/17) as well as the lesions on the  
378 skulls (5/17) suggest the killing of soldiers once on the ground. We argue that the characteristics  
379 of the wounds and locations of the blows (head, face and upper limbs) are likely the results of a  
380 close combat with knives between two professional armies. Skull blows are often more severe in  
381 cases of anti-personal violence and abuse, possibly because the head is considered the seat of  
382 identity [84–86].

383

384 **Figure 3. Lesions and Paleopathological data for individuals recovered from Gr. 337.** Each box  
385 represents one individual characterized by its numeric ID (fig. S8). The skeleton schematics represent the  
386 reconstructed in situ grave position. Red stars on gray body shape point to the location of traumatic injuries.  
387 Black circles and rectangles indicate macroscopic observations of traumatic injuries on bones and selected  
388 epifluorescence macroscope photos (profile a, b and posterior view, fig. S6).

389

390 The statures of the individuals from the mass graves are higher than the other individuals buried  
391 in the convent (1.72 m for burial Gr. 322, 1.68 m for Gr. 337 and 1,61 m for the other; fig. S2A;  
392  $p = 0.00192$ , ANOVA, Shapiro-Wilk normality test  $W = 0.99108$ ,  $p = 0.93$ ) (**SI Text section**  
393 **Physical anthropology**; fig. S2A and table S2). Those from Gr. 322 are significantly taller than  
394 those from groups **I** and **O** (fig. S2B); the individuals of Gr. 337 are also statistically taller than  
395 group **I**. The height standard deviation is also lower in those graves relative to other groups, which  
396 shows a certain homogeneity in morphology. If the morphology of individuals reflects both genetic  
397 and mesological parameters [87–91], the clear difference between these graves and the rest of the  
398 convent suggest a specific recruitment of the buried individuals. In archeological assemblages that  
399 are not biased regarding recruitment, average stature can be an indicator of people's living  
400 conditions and their evolution [91–93]. Classically, stature is linked to the intertwined effects of  
401 genetics, culture and environmental factors -including diet. Here, on the contrary, the elevated  
402 height could reflect a selection of individuals recruited in the army [55].

403

#### 404 ***Radiocarbon chronology: an event of the 15th century***

405 Assuming that these graves belonged to soldiers who died during combat, we still have to establish  
406 the time of the war event. Radiocarbon analyses offer a rather wide range for both tombs, from the  
407 middle of the 15th century to the end of the 16th century (**SI Text section datation**; fig. S5). The  
408 lack of dating precision is due to an unfortunate plateau effect in the isotopic calibration curve  
409 between the 15th and 17th centuries. During this period, Upper Brittany experienced only two  
410 conflicts within its borders: the War of Brittany (1487-1491) and the League War (1589-1598).  
411 The absence of gunshot injuries, the high number of stab wounds and the absence of historical  
412 records argues for a late 15th century conflict [7,83]. Rennes has only known one major violent

413 episode likely to have caused casualties during this time period. It is dated from 1491AD and it  
414 corresponds to the conquest of the city of Rennes by the French forces, all the rest of the Duchy  
415 of Brittany being already under their control. The few objects (3 different sets of pearls from the  
416 same jet rosary and the lower half of a bell) found in direct contact with the bodies suggest the  
417 absence of a complete skinning (careful search and/or theft of corpses and presence of clothing)  
418 (fig. S4) [82,94]. The presence of a rosary probably could illustrate a benevolent attention at the  
419 time of the inhumation of these victims [83].

420

#### 421 *Carbon and nitrogen stable isotope results*

422 All the isotope results for samples and standards are available in the Supplementary Tables S6 to  
423 S9.

424

425

426 **Figure 4. Carbon, Nitrogen and Sulfur isotopes values within Jacobins' mass graves. To the top:**  
427 Sulfur isotope composition of human remains across Europe according to [Bataille et al., this issue \[1\]](#) and  
428  $\delta^{34}\text{S}$  values for individuals of the Jacobins' mass graves. The first point represents the average  $\delta^{34}\text{S}$  values  
429 from childhood and is based on teeth roots' collagen, the second point represents the average  $\delta^{34}\text{S}$  values  
430 from adulthood and is based on bones' collagen, the local range represents the animals range according  
431 Colleter et al. [74]. **Middle:** Nitrogen and carbon isotope values of the teeth and bones of the individuals  
432 from the mass graves 322 and 337, compared to the individuals buried within the convent (inside and  
433 outside. **Bottom:** Carbon and nitrogen ratios in the collagen of the bone for the individuals of the mass Gr.  
434 322 and 337. The colors indicate the provenance of the individuals, based on their  $\delta^{34}\text{S}$ , grey when values  
435 are unknown.

436

437 The values for the 4 individuals of the mass grave 322 are quite heterogeneous for nitrogen  
438 isotopes, ranging from 9.5 (individual 20185) to 13.0‰ (20193) in bones and from 9.7 (20185) to

439 12.8‰ (20183). Those values are similar in the bones and the teeth belonging to the same  
440 individual, except for the individual 20188 which exhibits a higher  $\delta^{15}\text{N}$  in bone relative to his M3  
441 (**Fig. 4**). Carbon isotopes values are ranging from -18.7 to 20.1‰ in bones and -19.1 to 20.2‰ in  
442 teeth. Nitrogen isotope ratios of the individuals 20183 and 20193 overlap with that of the  
443 individuals buried in the church of the nearby convent, which are well-off individuals (**Fig. 4** [74]).  
444 Conversely, the individual 20185 exhibit the lowest  $\delta^{15}\text{N}$  value of the whole convent, grave 337  
445 excluded.

446

447 It is indeed in the grave 337 that the lowest  $\delta^{15}\text{N}$  values can be found in the bones of the individuals  
448 20799 and 20801. This individual 20801 is one of the four riders identified in the two graves (**Fig.**  
449 **5**). This second grave also exhibits heterogeneous  $\delta^{15}\text{N}$  in the skeletons of the different individuals,  
450 with the higher value of 14.6‰ for the individual 20794 who also has been identified as a rider  
451 (**Fig. 5**). The values in the teeth are also homogenous in the teeth and bones of the same individuals  
452 (**Fig. 4**).

453

454

455

456 **Figure 5. Nitrogen and sulfur isotope data of the soldiers in the graves 337 and 322** in relation to their  
457 wound marks on bones. T stands for teeth values and B for bones.

458

#### 459 *Sulfur, oxygen and strontium isotopes*

460 We used  $\delta^{34}\text{S}$ ,  $\delta^{18}\text{O}$  and  $^{87}\text{Sr}/^{86}\text{Sr}$  from bones and teeth of individuals from the mass grave to  
461 reconstruct the mobility, childhood and/or adolescence origin and last years of life of selected  
462 individuals from each grave. We analyzed  $\delta^{18}\text{O}$  and  $^{87}\text{Sr}/^{86}\text{Sr}$  in dental enamel as well as  $\delta^{34}\text{S}$  in  
463 collagen of teeth and bones for a selection of individuals (tables S6 to S8). Teeth form during a  
464 person's childhood or adolescence and preserve the isotopic composition of that period [95]  
465 whereas bones record approximately the integrated isotopic value of the last 10 to 20 years of life

466 [96]. When sampling the tooth root for sulfur while we sampled the crown for Sr and O isotopes,  
467 we are sampling two tissues successively forming. The following geographical assignments that  
468 we are making therefore relies on the assumption that the individual stayed in the same region at  
469 the time of his tooth formation.

470

471 Grave Gr. 322

472 Among the 4 individuals of the Gr. 322, 3 have  $^{87}\text{Sr}/^{86}\text{Sr}$ ,  $\delta^{18}\text{O}$  and  $\delta^{34}\text{S}$  ranges compatible with  
473 local ranges defined in Colleter et al. and Jaouen et al. [26,74]. Two of the individuals (20188 and  
474 20193) have a tooth  $\delta^{34}\text{S}$  value slightly out of the range defined for Rennes area [74] but the  $\delta^{34}\text{S}$   
475 values of their bones fit with the local range. This observation suggests that those individuals  
476 moved during their life, possibly coming from the more inland region of Brittany on the Eastern  
477 part of the Armorican Massif (**Fig. 4**). This moving possibly happened shortly after their  
478 adolescence, when they were age of 16-35 years old for the first one and 16-25 years old for the  
479 second one as they both died quite young and that the teeth analyzed were M3 (**SI Text section**  
480 **Isotopes data**; table S7). This hypothesis is plausible for the individual 20193 according to its dual  
481  $^{87}\text{Sr}/^{86}\text{Sr} - \delta^{18}\text{O}$  isotope assignment (**Fig. 4** [1]). Individual 20188 could i) come from central  
482 Brittany ii) come from a totally different region showing similar  $^{87}\text{Sr}/^{86}\text{Sr} - \delta^{18}\text{O}$  values as Brittany  
483 including the Aragon Kingdom (allied to Brittany during the French Breton war) or the Aquitaine  
484 area (part of the French Kingdom, the opponent of Brittany) or iii) be local but have eaten less fish  
485 which tends to lower  $\delta^{34}\text{S}$  values [97–99]. This latter hypothesis is also supported by the elevated  
486  $\delta^{15}\text{N}$  value of the tooth of this individual, which is the highest of the four soldiers in Gr. 322. One  
487 soldier (20183) has  $^{87}\text{Sr}/^{86}\text{Sr}$  and  $\delta^{18}\text{O}$  values compatible with the local isotope ranges but the  
488 lowest  $\delta^{34}\text{S}$  values in teeth for the two mass graves. This very inland  $\delta^{34}\text{S}$  signature is incompatible

489 with the hypothesis of a childhood spent in Brittany. Similarly, the bone  $\delta^{34}\text{S}$  value for this  
490 individual is also out of the Brittany range, though it is closer to it (**Fig. 4**). This means that the  
491 individual moved during the course of his life, and possibly returned to Brittany within the last  
492 few years before his death. As bones turnover slowly over a period of several years, this would  
493 explain the intermediate  $\delta^{34}\text{S}$  value observed in the bones of this individual. Possible childhood  
494 locations in Europe for this individual are: Marnes region (France) or inland Spain. Based on the  
495 triple isotope assignment, the most likely place of childhood would be the region stretching from  
496 the region of Coulommiers/Melun (South-East from Paris, France), but the lack of additional data  
497 prevents us from drawing further conclusions. All the isotopic values for individual 20185 are  
498 compatible with the local range, and triple isotope assignments show strong probability of  
499 childhood origin in Brittany. Nevertheless, the isotopic values are also compatible with  
500 international regions: Northern Spanish coast, Aquitaine coast, Cornwall and Wales. However,  
501 since the isotope values for nitrogen, carbon and sulfur are extremely similar between teeth and  
502 bones, it is likely that the individual did not move during his life and was local.

503

504

505 **Figure 6: Maps showing the probability of childhood origin of all individuals** for which teeth were  
506 available in the mass graves. Maps of possible geographical origins are calculated by comparing predicted  
507 isotope variations on the landscape with isotope analyses from tooth enamel for Sr and O isotopes and from  
508 tooth's collagen for S isotopes [1]. Single, dual and triple isotope geographic assignments were performed  
509 for each individual but only the results from triple isotope geographic assignments are displayed. For  
510 individuals 20787 and 20788, not enough collagen was preserved for analyzing  $\delta^{34}\text{S}$  values and only dual  
511 Sr-O isotope geographic assignments are displayed.

512

### 513 Mass grave Gr. 337

514 Among the 28 individuals of the Gr. 337, we conducted isotope analyses for 6 teeth and 22 bones  
515 belonging to 23 different individuals. For sulfur isotopes, 16/22 of the human bone data and 3/6  
516 human tooth data are from this study, and the rest was published in Colleter et al. [74]. All  $\delta^{18}\text{O}$   
517 and  $\delta^{13}\text{C}$  of tooth enamel are from this study. Finally, 3/6  $^{87}\text{Sr}/^{86}\text{Sr}$  human isotope data are from  
518 this study, the three other individuals were analyzed in Jaouen et al. [26].

519

520 The  $\delta^{34}\text{S}$  values in both teeth and bones are lower than the local range. A Nemenyi test following  
521 a Kruskal Wallis test shows that the individuals from the Gr. 337 have  $\delta^{34}\text{S}$  values significantly  
522 different from the individuals buried in the church who were likely locals (group I;  $p = 0.0002$ ).  
523 Only three of the 21 individuals analyzed from bones (14%) of the mass Gr. 337 have isotopic  
524 values compatible with the local range (20781, 20789 and 20768) (**Fig. 4**). One of these individuals  
525 (20781) had a tooth preserved and was analyzed for S, O and Sr isotopes. This individual is not  
526 compatible with the local range but is rather compatible with western France (Poitou, Charentes  
527 area) but also England, the Netherlands and Asturia. For the two other individuals, no teeth were



528 preserved and we could not further assess their region of childhood origin. Consequently, we can  
529 only conclude that they lived in a coastal region but not necessarily Brittany (**Fig. 4**).

530

531 Based on  $\delta^{34}\text{S}$  geographic assignment from bones, individuals from this mass grave have a broad  
532 range of origin.  $\delta^{34}\text{S}$  values range between 5‰ and 13‰ which span the baseline values of most  
533 of the French Kingdom (**Fig. 4**). For the six individuals for whom multiple isotope analysis was  
534 possible (**Fig. 6**), all these individuals have ranges compatible with a French origin (6/6). While  
535 less likely, these individuals could also come from different foreign kingdoms: 2/6 could come  
536 from Brittany (individuals 20787, 20788- although no S isotope values are available for those  
537 individuals), half of them could come from England (individuals 20764, 20781 and 20788, either  
538 3/6), all of them from current Spain, but two of them likely come from region that did not belong  
539 to Castille and Aragon in 1491 (20765, 20781,), and 5/6 from the Holy German Empire (20764,  
540 20765, 20781, 20788, 20801) (**Fig. 6**). Within the Holy German Empire, two of them are likely to  
541 come from the Netherlands and/or Belgium whereas no historical sources identify the recruiting  
542 of mercenaries from this region. If from a single political entity, the most likely candidate of origin  
543 for the soldiers of the grave 337 would therefore be the French Kingdom.

544

545 The  $\delta^{15}\text{N}$  and  $\delta^{34}\text{S}$  values of bones and teeth of this group are highly variable. The standard  
546 deviation for both of these isotopic systems are at least twice larger in this group than for other  
547 groups buried in the convent (**Fig. 4**). The  $\delta^{15}\text{N}$  and  $\delta^{13}\text{C}$  values in bones and teeth correlate,  
548 suggesting that the individuals exhibiting the higher  $\delta^{15}\text{N}$  ratios could include more marine fish  
549 than the others into their diet [27]. In spite of the isotopic variability seen in the group, most  
550 individuals have  $\delta^{34}\text{S}$  values grouping between 8 to 9‰ (14/21). Among the individuals exhibiting

551 those  $\delta^{34}\text{S}$  and for which Sr and O isotope values are available, the region of origin seems to be  
552 non-Breton Western France. The individual 20794, who comes from an inland region, and is  
553 younger than other individuals, is also clearly isotopically distinct from the others (**Fig. 4**). The  
554 other individuals coming from regions showing a similar  $\delta^{34}\text{S}$  values have a diet much poorer in  
555 animal proteins. Among the individuals with those  $\delta^{34}\text{S}$  values for which  $^{87}\text{Sr}/^{86}\text{Sr}$  and  $\delta^{18}\text{O}$  values  
556 have been obtained, the geographical origin seems to have been the Alps or the Pyreneans. The  
557  $\delta^{15}\text{N}$  of the mass Gr. 337 cannot be distinguished from that of the other local groups given the  
558 large range exhibited by those individuals. Overall, this high heterogeneity in isotopic composition  
559 suggests different diet, social status, and two main geographical origins: non-Breton Western  
560 France and French mountains or Switzerland.

561

562

## 563 **Discussion**

### 564 *A small group of Breton soldiers*

565 When using single, dual and triple isotope geographic assignments, 3 out of the 4 individuals from  
566 Gr. 322 (20193, 20185 and 20188) show a high probability of origin in Brittany (**Fig. 4**). However,  
567 we note that while the  $\delta^{34}\text{S}$  values in bone collagen from these same individuals are high, they are  
568 not identical to that of the teeth collagen. This observation suggests some regional mobility over  
569 the last decade of life within a mostly coastal region. The dual  $\delta^{18}\text{O}$  -  $^{87}\text{Sr}/^{86}\text{Sr}$  assignment for the  
570 fourth individual (20183) excludes Brittany (**Fig. 6**). A more mainland origin of this individual is  
571 reinforced by the very low  $\delta^{34}\text{S}$  values in his tooth collagen (**Fig. 4**). Nevertheless, the much higher  
572  $\delta^{34}\text{S}$  values in bone collagen also indicates that this individual moved to a more coastal region in

573 its adult life (**Fig. 4**). Based on the combined isotopic data, the most likely region of origin of the  
574 childhood for this individual is North Central France, Southern France or central Spain (**Fig. 6**).  
575 This individual also shows the same specific mitochondrial haplogroup (H3+152) with two  
576 specific mutations (7805 and 16249) as two other individuals of Gr. 322 (20188, 20193) [16].  
577 These specific polymorphisms are also found in the DNA of Louise de Quengo, a Breton aristocrat  
578 buried in the same convent 165 years later and who is also the local woman analyzed in our  
579 associated study [1,56]. This shared mitochondrial haplogroup strongly suggests family ties within  
580 Brittany. Based on  $\delta^{15}\text{N}$  and  $\delta^{13}\text{C}$  data from teeth and bone collagen, two individuals from Gr. 322  
581 (20188 and 20183), had a diet rich in animal protein suggesting a higher social status and, perhaps,  
582 a link to nobility (**Fig. 4**). They are also the tallest of the series with a mean stature of 1.72 m (**SI**  
583 **Text section Physical anthropology data**; fig. S2 and table S2). The fourth individual from Gr.  
584 322 (20185) has all the isotopic characteristics of a local individual, but his diet seems to indicate  
585 a much more modest origin. We conclude that individuals from Gr. 322 are from the Breton camp.  
586 At least one of these individuals (20183) covered a large distance over the last few years while  
587 others might have traveled more regionally to the area of conflict. The presence of multiple old  
588 healed stab wounds and the intermediate  $\delta^{34}\text{S}$  values of individual 20183, suggest a relatively  
589 recent (few years at most) movement of a professional soldier allied to the Breton camp. Its diet  
590 rich in animal protein and mitochondrial haplogroup makes us favor the hypothesis of a noble  
591 military over a mercenary sent by Brittany's allies described in historical sources [45,46,100,101].

592

### 593 *A Royal Army Tomb*

594 We could only recover teeth of 6 individuals in Gr. 337, and only 4 of those 6 individuals had  
595 enough preserved collagen for  $\delta^{34}\text{S}$  analyses. Individuals from Gr. 337 display a much broader

596 variety of natal origin than those in Gr. 322 when using dual  $\delta^{18}\text{O}$  -  $^{87}\text{Sr}/^{86}\text{Sr}$  and triple isotope  
597 assignments (**Fig. 6**). Two individuals show high probability of origin during their childhood in  
598 western France including some regions of Brittany (20787; 20788). Teeth collagen was not  
599 preserved for these individuals and we could not validate if their  $\delta^{34}\text{S}$  values were also compatible  
600 with Brittany (**Fig. 6**). Two individuals show high probabilities of origin during their childhood  
601 from the northern Paris basin, Poitou region or Rhone valley (20781, 20765). Besides regions from  
602 mainland France, these individuals also show high probabilities of origin in regions of Spain,  
603 Flanders and England which could correspond to the allies of the Duchess Anne (the mercenaries  
604 sent, respectively, by Ferdinand of Aragon, Maximilian of Austria and Henry the VII). However,  
605 the mercenaries sent by different countries probably fought separately [46] making it unlikely that  
606 they would be buried together with their enemies in a mass grave. Two individuals show high  
607 probabilities of origin in the Alps excluding almost all other regions of Europe (20764, 20801).  
608 One of those individuals have been identified as a rider (20801) and another rider shows a similar  
609 bone  $\delta^{34}\text{S}$ . Based on the fact that armies from different regions fought separately, we can assume  
610 that all individuals from the grave 337 belong to the same political entity. Since all the individuals  
611 of the grave 337 are compatible with a French origin, we argue that individuals of the Gr. 337  
612 correspond to soldiers of the royal camp recruited from different regions of Western mainland  
613 France and the Alps, which fits with historical sources [101]. In particular, the existence of soldiers  
614 coming from Switzerland and the Dauphine region has been documented during the French-Breton  
615 war and strongly argue for Gr. 337 to represent the Royal camp [101].

616

617 To validate this hypothesis, we further analyzed  $\delta^{34}\text{S}$  values in bones of 21 individuals from Gr.  
618 337 (table S6). 18/21 individuals are incompatible with local Brittany  $\delta^{34}\text{S}$  values (**Fig. 4**) further

619 indicating that these individuals moved a short time prior to their death to Rennes. The individuals  
620 have  $\delta^{34}\text{S}$  values in their bones between 5.3 and 12.6‰, which are all compatible with regions  
621 corresponding to the French Kingdom territory of that time, according to the  $\delta^{34}\text{S}$  isoscape that we  
622 developed for this study (**Fig. 4**). While some of these individuals could also originate from  
623 international regions allied with the Breton Camp, only 3 of them have values compatible with a  
624 coastal (and therefore possibly Breton) origin. One of them was a rider (20781), whom triple  
625 isoscape demonstrates a non-Breton origin (**Fig. 6**). The three lowest  $\delta^{34}\text{S}$  from bone or tooth also  
626 belongs to riders (**Figs. 4, 5**). Interestingly, the  $\delta^{34}\text{S}$  values of the non-rider individuals fall within  
627 a tight range between 7 and 10‰ (**Fig. 4**). While these values do not fit with Brittany, they are  
628 typical of western France and suggest a preferential recruitment from these regions of France for  
629 this conflict, which fits with historical documents mentioning soldiers coming from Poitou and  
630 Normandy (**Fig. 7**) [101].  $\delta^{13}\text{C}$  and  $\delta^{15}\text{N}$  values from teeth collagen indicate a variable diet for  
631 individuals of Gr. 337 compared to other individuals buried in the convent (**Fig. 4**) [74]. While  
632 some individuals appear to have had a diet comparable to that of the social elites buried in the  
633 adjoining convent, others have the lowest values of  $\delta^{15}\text{N}$  in the series, reflecting a diet mostly  
634 based on plant sources. This disparity of diet further reinforces the idea that this grave gathered  
635 soldiers recruited from a variety of social status and geographical regions from mainland France.

636

637 **Figure 7. Maps showing the location of residence of all recovered individuals (for which bones were**  
638 **available) towards the end of their life.** Maps of possible geographical origins are based on  $\delta^{34}\text{S}$  values.  
639 The probability maps are averaged by group: Gr. 322: 4 individuals; Gr 337 riders: 3 individuals identified  
640 as riders; Gr. 337; Other: 18 individuals. To generate these figures see **Bataille et al., in this issue** [1].

641

642 *Soldiers from different sides buried in the same place*

643 These isotopic interpretations shed new light onto this undocumented conflict and raises new  
644 archeological questions. While other victims could have been buried elsewhere, an intriguing  
645 observation is the relative imbalance in the individual death count between the two graves,  
646 particularly when considering the defeat of the Brittany camp. The French soldiers (Gr. 337) are  
647 numerous, buried together and far from their home. Conversely, only four individuals were buried  
648 there from the Brittany camp. Based on the isotope interpretations, three of them are from regions  
649 distant from the battlefield . It is possible that only individuals with distant residences were buried  
650 on site explaining the higher Royal camp count. Another intriguing observation is the common  
651 burial place for soldiers of opposite camps. The high status and reputation of the Jacobins convent,  
652 also chosen to sign the peace treaty between King Charles VIII of France and Anne of Brittany on  
653 November 15, 1491 [42], may explain the choice of this place for these burials [50]. The presence  
654 of a famous and miraculous icon in the convent (“Notre-Dame de Bonne Nouvelle” meaning Our  
655 Lady of Good News) has undoubtedly guaranteed the sacred nature of the buildings and perhaps  
656 ensured an area of relative neutrality. The powerful Dominican friars were able to welcome in their  
657 cemetery the belligerents of both sides and allow, as suggested by the rosary and the absence of  
658 skinning, a slightly more careful inhumation than what is observed for most war victims of this  
659 time period [102]. Based on historical sources, the lethality of the conflict was limited [45].

660

661 Through a case study in Brittany, we demonstrated that a novel framework combining several  
662 traditional archeological tools and quantitative triple isotope geolocation techniques can shed light  
663 on unidentified and undocumented mass graves. Our interpretations provide critical insights into  
664 the origin, mobility and social status of buried individuals. This work, transferable to other graves,

665 provides key tools for completing the missing historical archives of this conflict and resolving new  
666 archeological or forensic questions.

667

## 668 **Concluding remarks**

669 Establishing human mobility using S isotopes is of high interest in archeology: this study shows  
670 that S isotopes can strongly complement other isotopic systems. It allows tracing migration that  
671 are often invisible with oxygen isotopes, which require large travel distances, and also further  
672 constraining provenance based on strontium isotopes, which can be redundant between distinct  
673 geographic regions. More than the simple identification of human provenance, our study shows  
674 that the use of this novel triple isotope geographic assignment in archeology can verify historical  
675 hypotheses on alliances and recruiting strategies in wars as well as improves historical archives by  
676 bringing information on the common soldiers' life when historical documents usually focus on  
677 leaders. The combination of isotopes with DNA also reveal some surprises: we indeed report the  
678 existence of an individual with family ties in Brittany who grew up far from his region of origin,  
679 but traveled and lived in Brittany to fight the war threatening its independence. The isotopes  
680 geographic assignment is a real golden standard to complement archives on the mobility of  
681 unidentified human remains and to access hitherto previously unreleased information.

682

683

684 **Acknowledgments:** Cost of isotope analyses was funded by the Max Planck Society. Salary  
685 support for Manuel Trost was provided by the Deutsche Forschungsgemeinschaft (DFG)

686 PALEODIET (Project 378496604) and by the European Research Council (ERC) ARCHEIS  
687 (grant 803676) project for Klervia Jaouen. This work was also supported in part by National  
688 Sciences and Engineering Research Council (NSERC) Discovery Grant RGPIN-2019-05709 to  
689 Clement Bataille. We are grateful to Philip Miller and Hilary Bataille for editing the English of  
690 the manuscript.

691

## 692 **References**

- 693 1. Bataille CP, Jaouen K, Milano S, Trost M, Steinbrenner S, Crubézy É, et al. Triple Sulfur-  
694 Oxygen-Strontium Isotopes Probabilistic Geographic Assignment of Archaeological  
695 Remains using a Novel Sulfur Isoscape of Western Europe. PLoS ONE. 2021.
- 696 2. Blanchard P, Castex D. A mass grave from the catacomb of Saints Peter and Marcellinus in  
697 Rome, second-third century AD. *Antiquity*. 2007; 989–998.
- 698 3. Duncan WN, Schwarz KR. A Postclassic Maya mass grave from Zacpetén, Guatemala.  
699 *Journal of Field Archaeology*. 2015;40: 143–165.  
700 doi:10.1179/0093469015Z.000000000113
- 701 4. McCormick M. Tracking mass death during the fall of Rome’s empire (I). *Journal of Roman*  
702 *Archaeology*. 2015;28: 325–357. doi:10.1017/S1047759415002512
- 703 5. Fiorato V, Boylston A, Knusel C, Erolin C. Blood red roses: The archaeology of a mass  
704 grave from the battle of Towton AD 1461. second. Oxford: Oxbow books; 2007. Available:  
705 [https://discovery.dundee.ac.uk/en/publications/blood-red-roses-the-archaeology-of-a-](https://discovery.dundee.ac.uk/en/publications/blood-red-roses-the-archaeology-of-a-mass-grave-from-the-battle-o)  
706 [mass-grave-from-the-battle-o](https://discovery.dundee.ac.uk/en/publications/blood-red-roses-the-archaeology-of-a-mass-grave-from-the-battle-o)
- 707 6. Castex D. Identification and Interpretation of Historical Cemeteries Linked to Epidemics.  
708 In: Raoult D, Drancourt M, editors. *Paleomicrobiology: Past Human Infections*. Berlin,  
709 Heidelberg: Springer Berlin Heidelberg; 2008. pp. 23–48. doi:10.1007/978-3-540-75855-  
710 6\_2
- 711 7. Holst MR, Sutherland TL. Towton Revisited – Analysis of the Human Remains from the  
712 Battle of Towton 1461. In: Eickhoff S, Schopper F, editors. *Schlachtfeld und Massengrab:*  
713 *Spektren Interdisziplinärer Auswertung von Orten der Gewalt*. Zossen; 2014. pp. 97–129.
- 714 8. Meyer C, Lohr C, Gronenborn D, Alt KW. The massacre mass grave of Schöneck-  
715 Kilianstädten reveals new insights into collective violence in Early Neolithic Central  
716 Europe. *PNAS*. 2015;112: 11217–11222. doi:10.1073/pnas.1504365112



- 717 9. Biagini P, Thèves C, Balaresque P, Gérard A, Cannet C, Keyser C, et al. Variola Virus in a  
718 300-Year-Old Siberian Mummy. *New England Journal of Medicine*. 2012;367: 2057–2059.  
719 doi:10.1056/NEJMc1208124
- 720 10. Thèves C, Cabot E, Bouakaze C, Chevet P, Crubézy É, Balaresque P. About 42% of 154  
721 remains from the “Battle of Le Mans”, France (1793) belong to women and children:  
722 Morphological and genetic evidence. *Forensic Sci Int*. 2016;262: 30–36.  
723 doi:10.1016/j.forsciint.2016.02.029
- 724 11. Schroeder H, Margaryan A, Szmyt M, Theulot B, Włodarczak P, Rasmussen S, et al.  
725 Unraveling ancestry, kinship, and violence in a Late Neolithic mass grave. *PNAS*.  
726 2019;116: 10705–10710. doi:10.1073/pnas.1820210116
- 727 12. Haak W, Brandt G, Jong HN de, Meyer C, Ganslmeier R, Heyd V, et al. Ancient DNA,  
728 Strontium isotopes, and osteological analyses shed light on social and kinship organization  
729 of the Later Stone Age. *PNAS*. 2008;105: 18226–18231. doi:10.1073/pnas.0807592105
- 730 13. Price TD, Johnson CM, Ezzo JA, Ericson J, Burton JH. Residential Mobility in the  
731 Prehistoric Southwest United States: A Preliminary Study using Strontium Isotope  
732 Analysis. *Journal of Archaeological Science*. 1994;21: 315–330.  
733 doi:10.1006/jasc.1994.1031
- 734 14. Bataille CP, Brennan SR, Hartmann J, Moosdorf N, Wooller MJ, Bowen GJ. A geostatistical  
735 framework for predicting variations in strontium concentrations and isotope ratios in  
736 Alaskan rivers. *Chemical Geology*. 2014;389: 1–15. doi:10.1016/j.chemgeo.2014.08.030
- 737 15. Willmes M, Bataille CP, James HF, Moffat I, McMorrow L, Kinsley L, et al. Mapping of  
738 bioavailable strontium isotope ratios in France for archaeological provenance studies.  
739 *Applied Geochemistry*. 2018;90: 75–86. doi:10.1016/j.apgeochem.2017.12.025
- 740 16. Thèves C, Mata X, Fromentier. Etude paléogénétique. Le Cloirec G. L’étude archéologique  
741 du couvent des Jacobins de Rennes (35), du quartier antique à l’établissement dominicain.  
742 Le Cloirec G. Cesson-Sévigné; 2016. pp. 2219-2224.
- 743 17. Schwarcz HP, Gibbs L, Knyf M. Oxygen isotope analysis as an indicator of place of origin.  
744 In: Pfeiffer S, Williamson RE, editors. *Snake Hill: An Investigation of a Military Cemetery*  
745 *from the War of 1812*. Toronto: Dundurn Press; 1991. pp. 263–268.
- 746 18. White CD, Spence MW, Longstaffe FJ, Law KR. Testing the Nature of Teotihuacán  
747 Imperialism at Kaminaljuyú Using Phosphate Oxygen-Isotope Ratios. *Journal of*  
748 *Anthropological Research*. 2000;56: 535–558. doi:10.1086/jar.56.4.3630930
- 749 19. Dupras TL, Schwarcz HP. Strangers in a Strange Land: Stable Isotope Evidence for Human  
750 Migration in the Dakhleh Oasis, Egypt. *Journal of Archaeological Science*. 2001;28: 1199–  
751 1208. doi:10.1006/jasc.2001.0640

- 752 20. White CD, Spence MW, Longstaffe FJ, Stuart-Williams H, Law KR. Geographic Identities  
753 of the Sacrificial Victims from the Feathered Serpent Pyramid, Teotihuacan: Implications  
754 for the Nature of State Power. *Latin American Antiquity*. 2002;13: 217–236.  
755 doi:10.2307/971915
- 756 21. White CD, Spence MW, Longstaffe FJ, Law KR. Demography and ethnic continuity in the  
757 Tlailotlacan enclave of Teotihuacan: the evidence from stable oxygen isotopes. *Journal of*  
758 *Anthropological Archaeology*. 2004;23: 385–403. doi:10.1016/j.jaa.2004.08.002
- 759 22. Chenery C, Müldner G, Evans J, Eckardt H, Lewis M. Strontium and stable isotope evidence  
760 for diet and mobility in Roman Gloucester, UK. *Journal of Archaeological Science*.  
761 2010;37: 150–163. doi:10.1016/j.jas.2009.09.025
- 762 23. Evans JA, Chenery CA, Montgomery J. A summary of strontium and oxygen isotope  
763 variation in archaeological human tooth enamel excavated from Britain. *Journal of*  
764 *Analytical Atomic Spectrometry*. 2012;27: 754–764. doi:10.1039/C2JA10362A
- 765 24. King CL, Bentley RA, Tayles N, Viðarsdóttir US, Nowell G, Macpherson CG. Moving  
766 peoples, changing diets: isotopic differences highlight migration and subsistence changes in  
767 the Upper Mun River Valley, Thailand. *Journal of Archaeological Science*. 2013;40: 1681–  
768 1688. doi:10.1016/j.jas.2012.11.013
- 769 25. Lightfoot E, O’Connell TC. On the Use of Biomineral Oxygen Isotope Data to Identify  
770 Human Migrants in the Archaeological Record: Intra-Sample Variation, Statistical Methods  
771 and Geographical Considerations. *PLoS ONE*. 2016;11: e0153850.  
772 doi:10.1371/journal.pone.0153850
- 773 26. Jaouen K, Colleter R, Pietrzak A, Pons M-L, Clavel B, Telmon N, et al. Tracing intensive  
774 fish and meat consumption using Zn isotope ratios: evidence from a historical Breton  
775 population (Rennes, France). *Scientific reports*. 2018;8: 5077.
- 776 27. Schoeninger MJ, Moore K. Bone stable isotope studies in archaeology. *Journal of World*  
777 *Prehistory*. 1992;6: 247–296. doi:10.1007/BF00975551
- 778 28. Buzon MR, Simonetti A, Creaser RA. Migration in the Nile Valley during the New  
779 Kingdom period: a preliminary strontium isotope study. *Journal of Archaeological Science*.  
780 2007;34: 1391–1401. doi:10.1016/j.jas.2006.10.029
- 781 29. Knudson KJ, Price TD. Utility of multiple chemical techniques in archaeological residential  
782 mobility studies: Case studies from Tiwanaku- and Chiribaya-affiliated sites in the Andes.  
783 *American Journal of Physical Anthropology*. 2007;132: 25–39. doi:10.1002/ajpa.20480
- 784 30. Frei KM, Skals I, Gleba M, Lyngstrøm H. The Huldremose Iron Age textiles, Denmark: an  
785 attempt to define their provenance applying the strontium isotope system. *Journal of*  
786 *Archaeological Science*. 2009;36: 1965–1971. doi:10.1016/j.jas.2009.05.007

- 787 31. Eckardt H, Chenery C, Booth P, Evans JA, Lamb A, Müldner G. Oxygen and strontium  
788 isotope evidence for mobility in Roman Winchester. *Journal of Archaeological Science*.  
789 2009;36: 2816–2825. doi:10.1016/j.jas.2009.09.010
- 790 32. Frei KM, Price TD. Strontium isotopes and human mobility in prehistoric Denmark.  
791 *Archaeological and Anthropological Sciences*. 2012;4: 103–114. doi:10.1007/s12520-011-  
792 0087-7
- 793 33. Scheeres M, Knipper C, Hauschild M, Schönfelder M, Siebel W, Pare C, et al. “Celtic  
794 migrations”: Fact or fiction? Strontium and oxygen isotope analysis of the Czech cemeteries  
795 of Radovesice and Kutná Hora in Bohemia. *American Journal of Physical Anthropology*.  
796 2014;155: 496–512. doi:<https://doi.org/10.1002/ajpa.22597>
- 797 34. Gregoricka LA, Sheridan SG. Continuity or conquest? A multi-isotope approach to  
798 investigating identity in the Early Iron Age of the Southern Levant. *American Journal of*  
799 *Physical Anthropology*. 2016;162: 73–89. doi:<https://doi.org/10.1002/ajpa.23086>
- 800 35. Killgrove K, Montgomery J. All Roads Lead to Rome: Exploring Human Migration to the  
801 Eternal City through Biochemistry of Skeletons from Two Imperial-Era Cemeteries (1st-  
802 3rd c AD). *PLOS ONE*. 2016;11: e0147585. doi:10.1371/journal.pone.0147585
- 803 36. Knipper C, Mittnik A, Massy K, Kociumaka C, Kucukkalipci I, Maus M, et al. Female  
804 exogamy and gene pool diversification at the transition from the Final Neolithic to the Early  
805 Bronze Age in central Europe. *PNAS*. 2017 [cited 10 Nov 2020].  
806 doi:10.1073/pnas.1706355114
- 807 37. Laffoon JE, Sonnemann TF, Shafie T, Hofman CL, Brandes U, Davies GR. Investigating  
808 human geographic origins using dual-isotope ( $^{87}\text{Sr}/^{86}\text{Sr}$ ,  $\delta^{18}\text{O}$ ) assignment approaches.  
809 *PLOS ONE*. 2017;12: e0172562. doi:10.1371/journal.pone.0172562
- 810 38. Scaffidi BK, Knudson KJ. An archaeological strontium isoscape for the prehistoric Andes:  
811 Understanding population mobility through a geostatistical meta-analysis of archaeological  
812  $^{87}\text{Sr}/^{86}\text{Sr}$  values from humans, animals, and artifacts. *Journal of Archaeological Science*.  
813 2020;117: 105121. doi:10.1016/j.jas.2020.105121
- 814 39. Cavazzuti C, Skeates R, Millard AR, Nowell G, Peterkin J, Brea MB, et al. Flows of people  
815 in villages and large centres in Bronze Age Italy through strontium and oxygen isotopes.  
816 *PLOS ONE*. 2019;14: e0209693. doi:10.1371/journal.pone.0209693
- 817 40. Bataille CP, Holstein ICC von, Laffoon JE, Willmes M, Liu X-M, Davies GR. A  
818 bioavailable strontium isoscape for Western Europe: A machine learning approach. *PLOS*  
819 *ONE*. 2018;13: e0197386. doi:10.1371/journal.pone.0197386
- 820 41. Pichot D. Le temps des Montfort : « l’État breton ». Apogée. Bretagne est univers Catalogue  
821 du Musée de Bretagne. Apogée. Presses universitaires de Rennes; 2006. pp. 86–94.

- 822 42. Le Cloirec G. L'étude archéologique du couvent des Jacobins de Rennes (35), du quartier  
823 antique à l'établissement dominicain. Cesson-Sévigné: INRAP Grand-Ouest; 2016 p. 3835.  
824 Report No.: 12 vol.
- 825 43. Meyer J. Histoire de Rennes. 2e ed. Toulouse: Privat; 1984.
- 826 44. Leguay J-P, Martin H. Fastes et malheurs de la Bretagne ducale 1213-1532. Ouest-France;  
827 1982.
- 828 45. Le Page D. 11 batailles qui ont fait la Bretagne. Morlaix: Skol Vreizh; 2015. Available:  
829 [https://www.skolvreizh.com/catalog?page=shop.product\\_details&product\\_id=%24product](https://www.skolvreizh.com/catalog?page=shop.product_details&product_id=%24product_id)  
830 [\\_id](https://www.skolvreizh.com/catalog?page=shop.product_details&product_id=%24product_id)
- 831 46. Currin JM. "The King's Army into the Partes of Bretagne": Henry VII and the Breton Wars,  
832 1489–1491. *War in History*. 2000;7: 379–412.
- 833 47. Albanao J, Cotton E. La dynastie des Habsbourg: La Maison d Autriche. Paris: Editions du  
834 Panthéon; 2012.
- 835 48. Charles VIII (King of France), La Trémoille LI de. Correspondance de Charles VIII et de  
836 ses conseillers avec Louis II de la Trémoille pendant la guerre de Bretagne, 1488. Genève:  
837 Mégariotis Reprints; 1978. Available: <https://gallica.bnf.fr/ark:/12148/bpt6k7065m>
- 838 49. Calmette J. La politique espagnole dans la crise de l'indépendance bretonne (1488-1492).  
839 *Revue Historique*. 1914;117: 168–182.
- 840 50. Martin H. Les ordres mendiants en Bretagne (vers 1230 - vers 1530). Pauvreté volontaire et  
841 prédication à la fin du Moyen-Âge. Rennes: Librairie C. Klincksieck, 11 rue de Lille, Paris;  
842 1975.
- 843 51. Mokrane FZ, Colleter R, Duchesne S, Gerard P, Savall F, Crubézy É, et al. Old hearts for  
844 modern investigations: CT and MR for archaeological human hearts remains. *Forensic*  
845 *Science International*. 2016; 14–24. doi:10.1016/j.forsciint.2016.08.035
- 846 52. Vovelle M. La mort et l'Occident. De 1300 à nos jours. Paris: Gallimard; 2000.
- 847 53. Boissavit-Camus B, Zadora-Rio E. L'organisation spatiale des cimetières paroissiaux. In:  
848 Galinié H, Zadora-Rio E, editors. Archéologie du cimetière chrétien - Actes du 2ème  
849 colloque ARCHEA Orléans, 29 septembre-1er octobre 1994. Tours: 11e supplément à la  
850 *Revue Archéologique de Centre de la France - Conseil Régional du Centre*; 1996. pp. 49–  
851 53.
- 852 54. Ariès P. *Hour of Our Death*. Vintage Books; 1981.
- 853 55. Colleter R. Pratiques funéraires, squelettes et inégalités sociales. Etude d'un échantillon des  
854 élites bretonnes à l'époque moderne. phd, Université de Toulouse, Université Toulouse III  
855 - Paul Sabatier. 2018. Available: <http://thesesups.ups-tlse.fr/4159/>

- 856 56. Colleter R, Dedouit F, Duchesne S, Mokrane F-Z, Gendrot V, Gérard P, et al. Procedures  
857 and Frequencies of Embalming and Heart Extractions in Modern Period in Brittany.  
858 Contribution to the Evolution of Ritual Funerary in Europe. PLoS ONE. 2016;11: e0167988.  
859 doi:10.1371/journal.pone.0167988
- 860 57. Colleter R, Dedouit F, Duchesne S, Gérard P, Dercele L, Poilpré P, et al. Study of a  
861 seventeenth-century French artificial mummy: autopsical, native, and contrast-injected CT  
862 investigations. International Journal of Legal Medicine. 2018;132: 1405–1413.  
863 doi:10.1007/s00414-018-1830-8
- 864 58. Bruzek J. A Method for Visual Determination of Sex, Using the Human Hip Bone.  
865 American Journal of Physical Anthropology. 2002;117: 157–168.  
866 doi:10.1002/ajpa.10012.abs
- 867 59. Murail P, Bruzek J, Houët F, Cunha E. DSP: a tool for probabilistic sex diagnosis using  
868 worldwide variability in hip-bone measurements. Bulletins et Mémoires de la Société  
869 d'Anthropologie de Paris. 2005; 167–176.
- 870 60. Schmitt A. Une nouvelle méthode pour estimer l'âge au décès des adultes à partir de la  
871 surface sacro-pelvienne iliaque. Bulletins et Mémoires de la Société d'Anthropologie de  
872 Paris. 2005;17: 89–101.
- 873 61. Moorrees CFA, Fanning EA, Hunt EE. Formation and resorption of three deciduous teeth  
874 in children. American Journal of Physical Anthropology. 1963;21: 205–213.  
875 doi:10.1002/ajpa.1330210212
- 876 62. Moorrees CFA, Fanning EA, Hunt EE. Age variation of formation stages for ten permanent  
877 teeth. Journal of dental Research. 1963;42: 1490–1502.
- 878 63. Birkner R. L'image radiologique typique du squelette : aspect normal et variantes chez  
879 l'adulte et l'enfant ; pour médecins, étudiants et manipulateurs. Paris: Maloine; 1980.
- 880 64. Owings Webb PA, Myers Suchey J. Epiphyseal union of the anterior iliac crest and medial  
881 clavicle in a modern multiracial sample of american males and females. American Journal  
882 of Physical Anthropology. 1985;68: 457–466.
- 883 65. Ruff CB, Holt BM, Niskanen M, Sladěk V, Berner M, Garofalo E, et al. Stature and body  
884 mass estimation from skeletal remains in the European Holocene. American Journal of  
885 Physical Anthropology. 2012;148: 601–617. doi:10.1002/ajpa.22087
- 886 66. Duda H, Courtaud P, Crubézy É, Sellier P, Tillier A-M. L'Anthropologie « de terrain » :  
887 reconnaissance et interprétation des gestes funéraires. Bulletins et Mémoires de la Société  
888 d'anthropologie de Paris. 1990;2: 29–49. doi:10.3406/bmsap.1990.1740
- 889 67. Aufderheide AC, Rodriguez-Martin C. The Cambridge Encyclopedia of Human  
890 Paleopathology. Cambridge University Press; 1998.

- 891 68. Capasso B. Brucellosis at Herculaneum (79 AD). *International journal of osteoarcheology*.  
892 1999;9: 277–288.
- 893 69. Ortner DJ, editor. *Identification of Pathological Conditions in Human Skeletal Remains*.  
894 Second. San Diego CA: Academic Press; 2003. Available:  
895 <http://www.sciencedirect.com/science/article/pii/B9780125286282500612>
- 896 70. Pinhasi R, Mays S, editors. *Advances in Human Palaeopathology*. Chichester: John Wiley  
897 & Sons; 2008. Available:  
898 [https://books.google.fr/books/about/Advances\\_in\\_Human\\_Palaeopathology.html?hl=fr&i](https://books.google.fr/books/about/Advances_in_Human_Palaeopathology.html?hl=fr&id=N_hVqemQCNUC)  
899 [d=N\\_hVqemQCNUC](https://books.google.fr/books/about/Advances_in_Human_Palaeopathology.html?hl=fr&id=N_hVqemQCNUC)
- 900 71. Waldron T. *Palaeopathology*. Cambridge: Cambridge University Press; 2009.
- 901 72. Villotte S. *Enthésopathies et activités des hommes préhistoriques : recherche*  
902 *méthodologique et application aux fossiles européens du Paléolithique supérieur et du*  
903 *Mésolithique*. Oxford: BAR International Series; 2009. Available:  
904 [https://books.google.fr/books/about/Enth%C3%A9sopathies\\_et\\_activit%C3%A9s\\_des\\_ho](https://books.google.fr/books/about/Enth%C3%A9sopathies_et_activit%C3%A9s_des_ho)  
905 [mmes.html?hl=fr&id=D7USQgAACAAJ](https://books.google.fr/books/about/Enth%C3%A9sopathies_et_activit%C3%A9s_des_ho)
- 906 73. Capuani C, Telmon N, Moscovici J, Molinier F, Aymeric A, Delisle M-B, et al. Modeling  
907 and determination of directionality of the kerf in epifluorescence sharp bone trauma  
908 analysis. *Int J Legal Med*. 2014;128: 1059–1066. doi:10.1007/s00414-014-1022-0
- 909 74. Colleter R, Clavel B, Pietrzak A, Duchesne S, Schmitt L, Richards MP, et al. Social status  
910 in late medieval and early modern Brittany: insights from stable isotope analysis.  
911 *Archaeological and Anthropological Sciences*. 2019;11: 823–837.
- 912 75. Talamo S, Richards M. A Comparison of Bone Pretreatment Methods for AMS Dating of  
913 Samples >30,000 BP. *Radiocarbon*. 2011;53: 443–449.
- 914 76. Deniel C, Pin C. Single-stage method for the simultaneous isolation of lead and strontium  
915 from silicate samples for isotopic measurements. *Analytica Chimica Acta*. 2001;426: 95–  
916 103.
- 917 77. Leclerc J. La notion de sépulture. *Bulletins et Mémoires de la Société d'Anthropologie de*  
918 *Paris*. 1990;2: 13–18. doi:10.3406/bmsap.1990.1738
- 919 78. Knüsel CJ, Robb J. Funerary taphonomy: An overview of goals and methods. *Journal of*  
920 *Archaeological Science: Reports*. 2016;10: 655–673. doi:10.1016/j.jasrep.2016.05.031
- 921 79. Vanezis P. Investigation of clandestine graves resulting from human rights abuses. *Journal*  
922 *of Clinical Forensic Medicine*. 1999;6: 238–242. doi:10.1016/S1353-1131(99)90004-4
- 923 80. Komar D. Differential decay rates in single, multiple, and mass graves in Bosnia.  
924 *Proceedings of the American Academy of Forensic Sciences Annual Meeting*. 2001;7: 242–  
925 243.

- 926 81. Jessee E, Skinner M. A typology of mass grave and mass grave-related sites. *Forensic*  
927 *Science International*. 2005;152: 55–59. doi:10.1016/j.forsciint.2005.02.031
- 928 82. Dutour O, Jankauskas R, Buzhilova AP. Ensembles funéraires liés à des faits de guerre.  
929 Cimetières et identités. Bordeaux: Ausonius; 2015. pp. 133–146. Available:  
930 [https://dokupdf.com/download/est-paru-cimetieres-et-identites-](https://dokupdf.com/download/est-paru-cimetieres-et-identites-_5a01b514d64ab2b9bd6733e5_pdf)  
931 [\\_5a01b514d64ab2b9bd6733e5\\_pdf](https://dokupdf.com/download/est-paru-cimetieres-et-identites-_5a01b514d64ab2b9bd6733e5_pdf)
- 932 83. Nicklisch N, Ramsthaler F, Meller H, Friederich S, Alt KW. The face of war: Trauma  
933 analysis of a mass grave from the Battle of Lützen (1632). *PLoS ONE*. 2017;12: e0178252.  
934 doi:10.1371/journal.pone.0178252
- 935 84. Walker PL. A Bioarchaeological Perspective on the History of Violence. *Annual Review of*  
936 *Anthropology*. 2001;30: 573–596. doi:10.1146/annurev.anthro.30.1.573
- 937 85. Murphy K, Waa S, Jaffer H, Sauter A, Chan A. A literature review of findings in physical  
938 elder abuse. *Canadian Association of Radiologists Journal = Journal l'Association*  
939 *Canadienne Des Radiologistes*. 2013;64: 10–14. doi:10.1016/j.carj.2012.12.001
- 940 86. Flieger A, Kölzer SC, Plenzig S, Heinbuch S, Kettner M, Ramsthaler F, et al. Bony injuries  
941 in homicide cases (1994-2014). A retrospective study. *International Journal of Legal*  
942 *Medicine*. 2016;130: 1401–1408. doi:10.1007/s00414-016-1407-3
- 943 87. Schreider E. Consanguinité et variations biologiques chez l'homme. *Population*. 1976;31:  
944 341–354. doi:10.2307/1530447
- 945 88. Marquer P. Endogamie, exogamie et variations de la stature et de l'indice céphalique dans  
946 la population béarnaise (Pyrénées-Atlantiques). *Bulletins et Mémoires de la Société*  
947 *d'Anthropologie de Paris*. 1979;6: 333–342. doi:10.3406/bmsap.1979.1969
- 948 89. Olivier G, Devigne G. Consanguinity and endogamy. *Journal of Human Evolution*. 1980;9:  
949 261–268. doi:10.1016/0047-2484(80)90054-8
- 950 90. Susanne C. Living conditions and secular trend. *Journal of Human Evolution*. 1985;14: 357–  
951 370. doi:10.1016/S0047-2484(85)80042-7
- 952 91. Vercauteren M. Evolution séculaire au XXe siècle. *Anthropologie biologique Evolution et*  
953 *biologie humaine*. De Boeck Université; 2003. pp. 539–547.
- 954 92. Heyberger L. Stature et niveau de vie biologique des conscrits du Limousin (1782-1940).  
955 Un indice de développement socio-économique. *Histoire & Sociétés Rurales*. 2005;24: 83–  
956 104.
- 957 93. Susanne C, Polet C. *Dictionnaire d'anthropobiologie*. De Boeck. Bruxelles: De Boeck  
958 Université; 2005.

- 959 94. Burgess A. The excavation and finds. In: Fiorato V, Boylston A, Knusel C, editors. *Blood*  
960 *Red Roses: The Archaeology of a Mass Grave from the Battle of Towton, AD 1461*. Oxford:  
961 Oxbow Books; 2000. pp. 29–35.
- 962 95. Hillson S. *Dental anthropology*. Cambridge: Cambridge University Press; 2008.
- 963 96. Hedges REM, Clement JG, Thomas CDL, O’Connell TC. Collagen turnover in the adult  
964 femoral mid-shaft: Modeled from anthropogenic radiocarbon tracer measurements.  
965 *American Journal of Physical Anthropology*. 2007;133: 808–816. doi:10.1002/ajpa.20598
- 966 97. Nehlich O, Borić D, Stefanović S, Richards MP. Sulphur isotope evidence for freshwater  
967 fish consumption: a case study from the Danube Gorges, SE Europe. *Journal of*  
968 *Archaeological Science*. 2010;37: 1131–1139. doi:10.1016/j.jas.2009.12.013
- 969 98. Nehlich O, Fuller BT, Jay M, Mora A, Nicholson RA, Smith CI, et al. Application of sulphur  
970 isotope ratios to examine weaning patterns and freshwater fish consumption in Roman  
971 Oxfordshire, UK. *Geochimica et Cosmochimica Acta*. 2011;75: 4963–4977.  
972 doi:10.1016/j.gca.2011.06.009
- 973 99. Privat KL, O’Connell TC, Hedges REM. The distinction between freshwater- and  
974 terrestrial-based diets: methodological concerns and archaeological applications of sulphur  
975 stable isotope analysis. *Journal of Archaeological Science*. 2007;34: 1197–1204.  
976 doi:10.1016/j.jas.2006.10.008
- 977 100. Jones M. *L’armée bretonne 1449-1491 : Structures et carrières*. La France de la fin du xve  
978 siècle : renouveau et apogée. Paris: CNRS Editions; 1985. pp. 147–166.
- 979 101. Contamine P. Chapitre X. L’armée du Roi de France : vue d’ensemble. *Guerre, État et*  
980 *société à la fin du Moyen Âge Tome 1 : Études sur les armées des rois de France 1337-1494*.  
981 Paris: Éditions de l’École des hautes études en sciences sociales; 2013. pp. 277–319.  
982 Available: <http://books.openedition.org/editionsehess/700>
- 983 102. Komar D. Patterns of Mortuary Practice Associated with Genocide: Implications for  
984 Archaeological Research. *Current Anthropology*. 2008;49: 123–133. doi:10.1086/524761
- 985



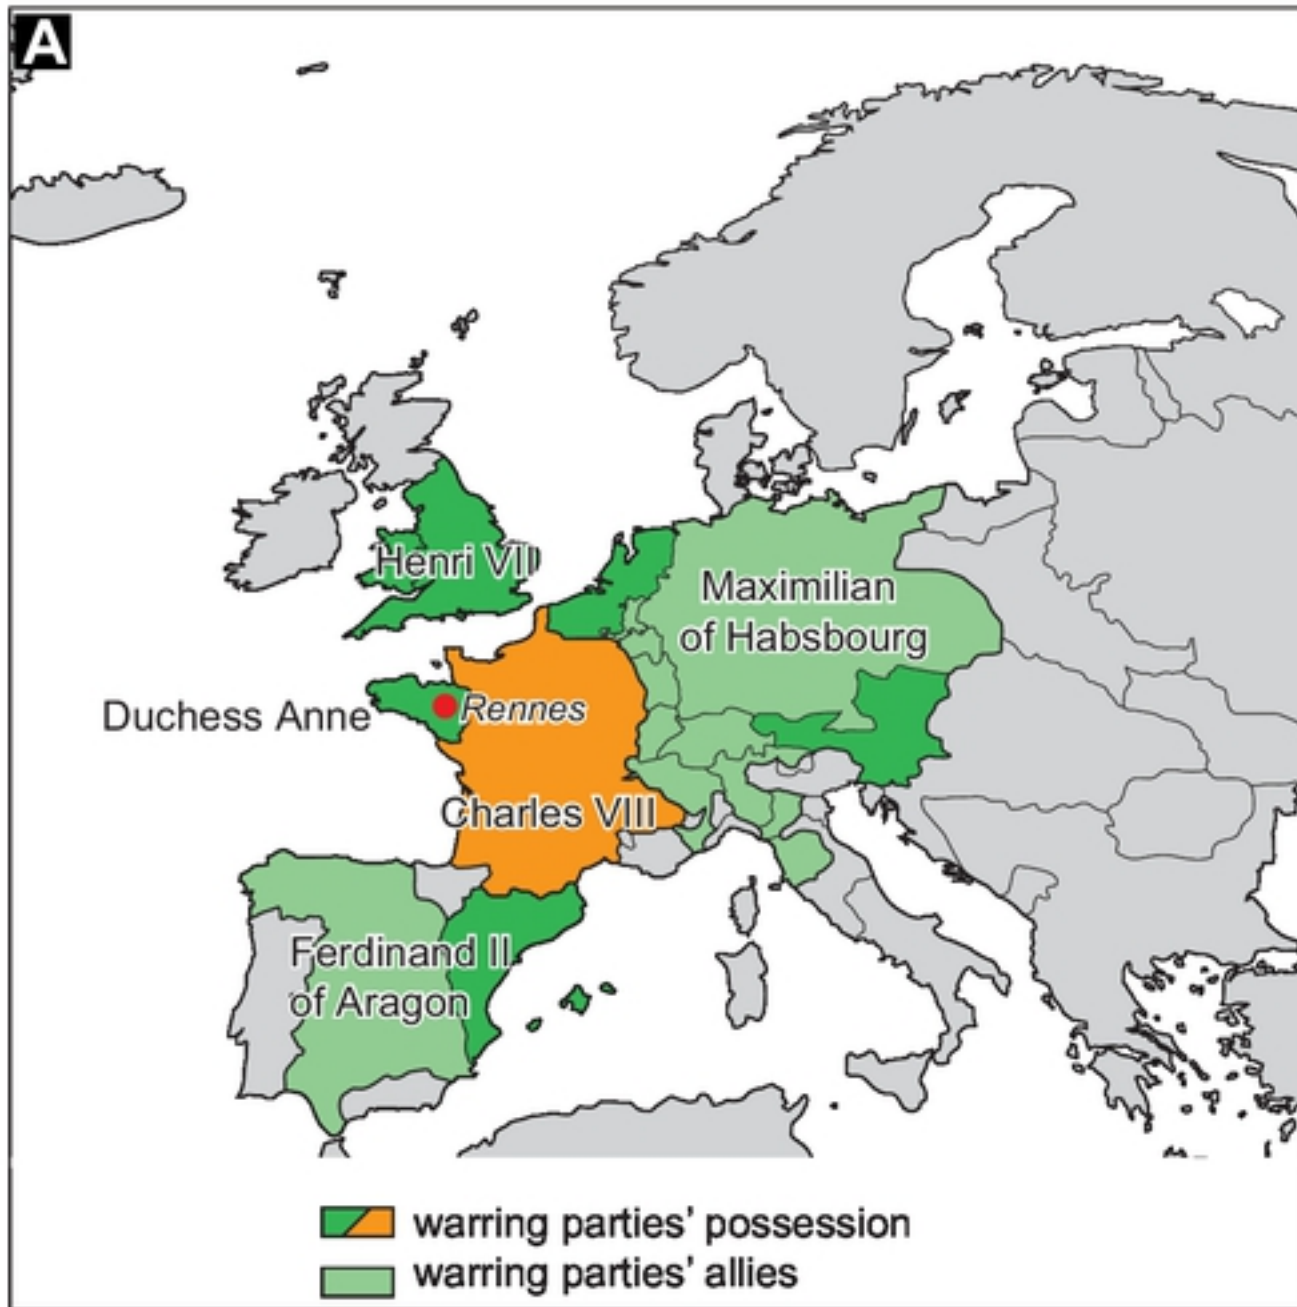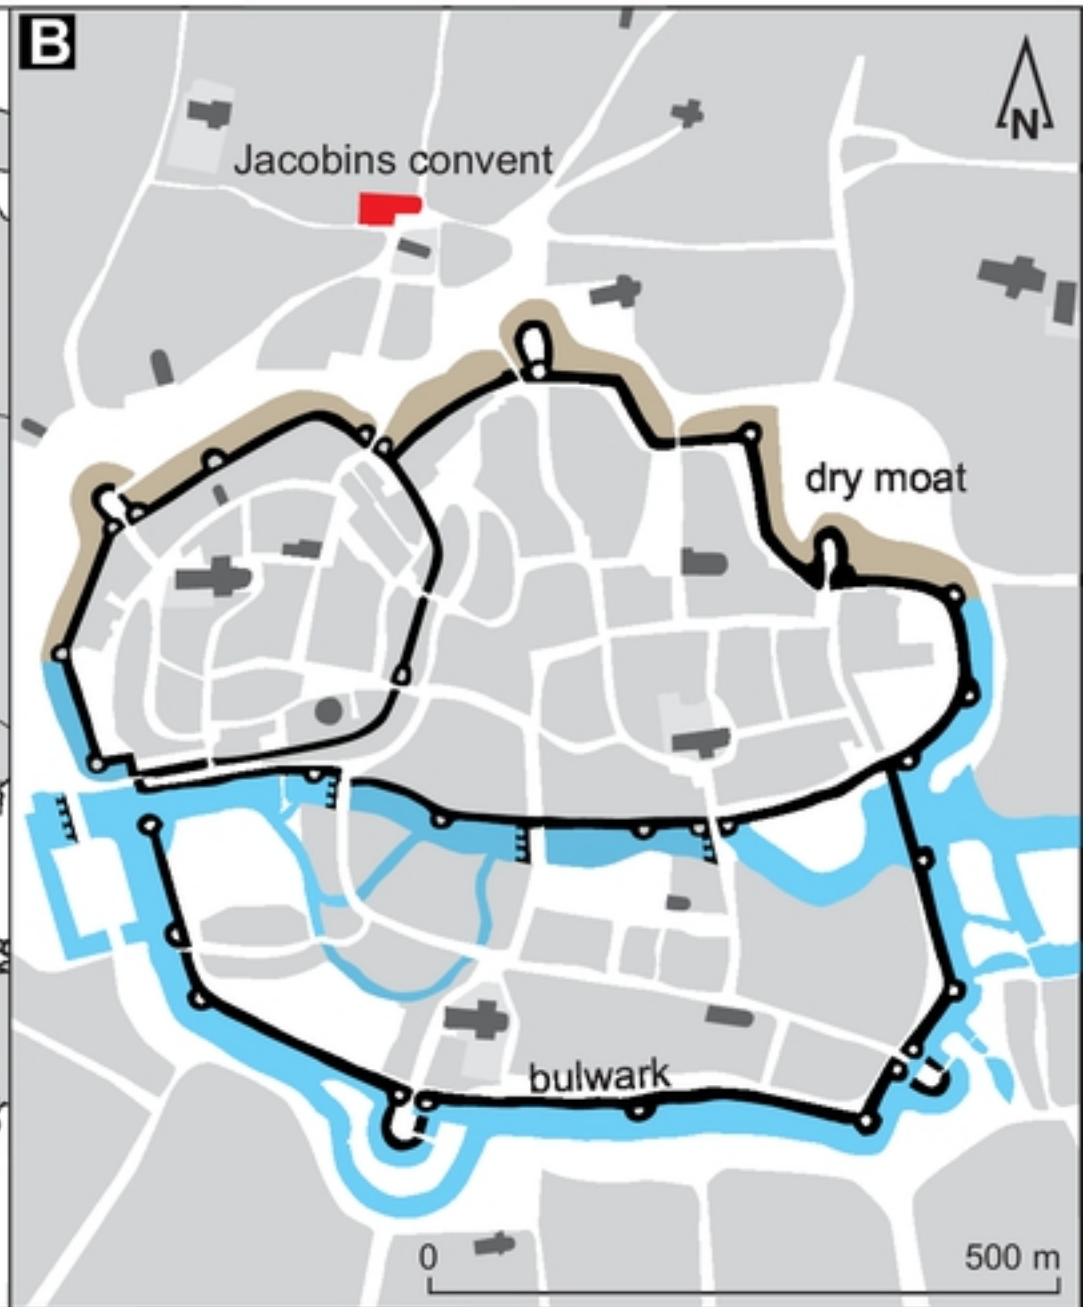

Figure 1

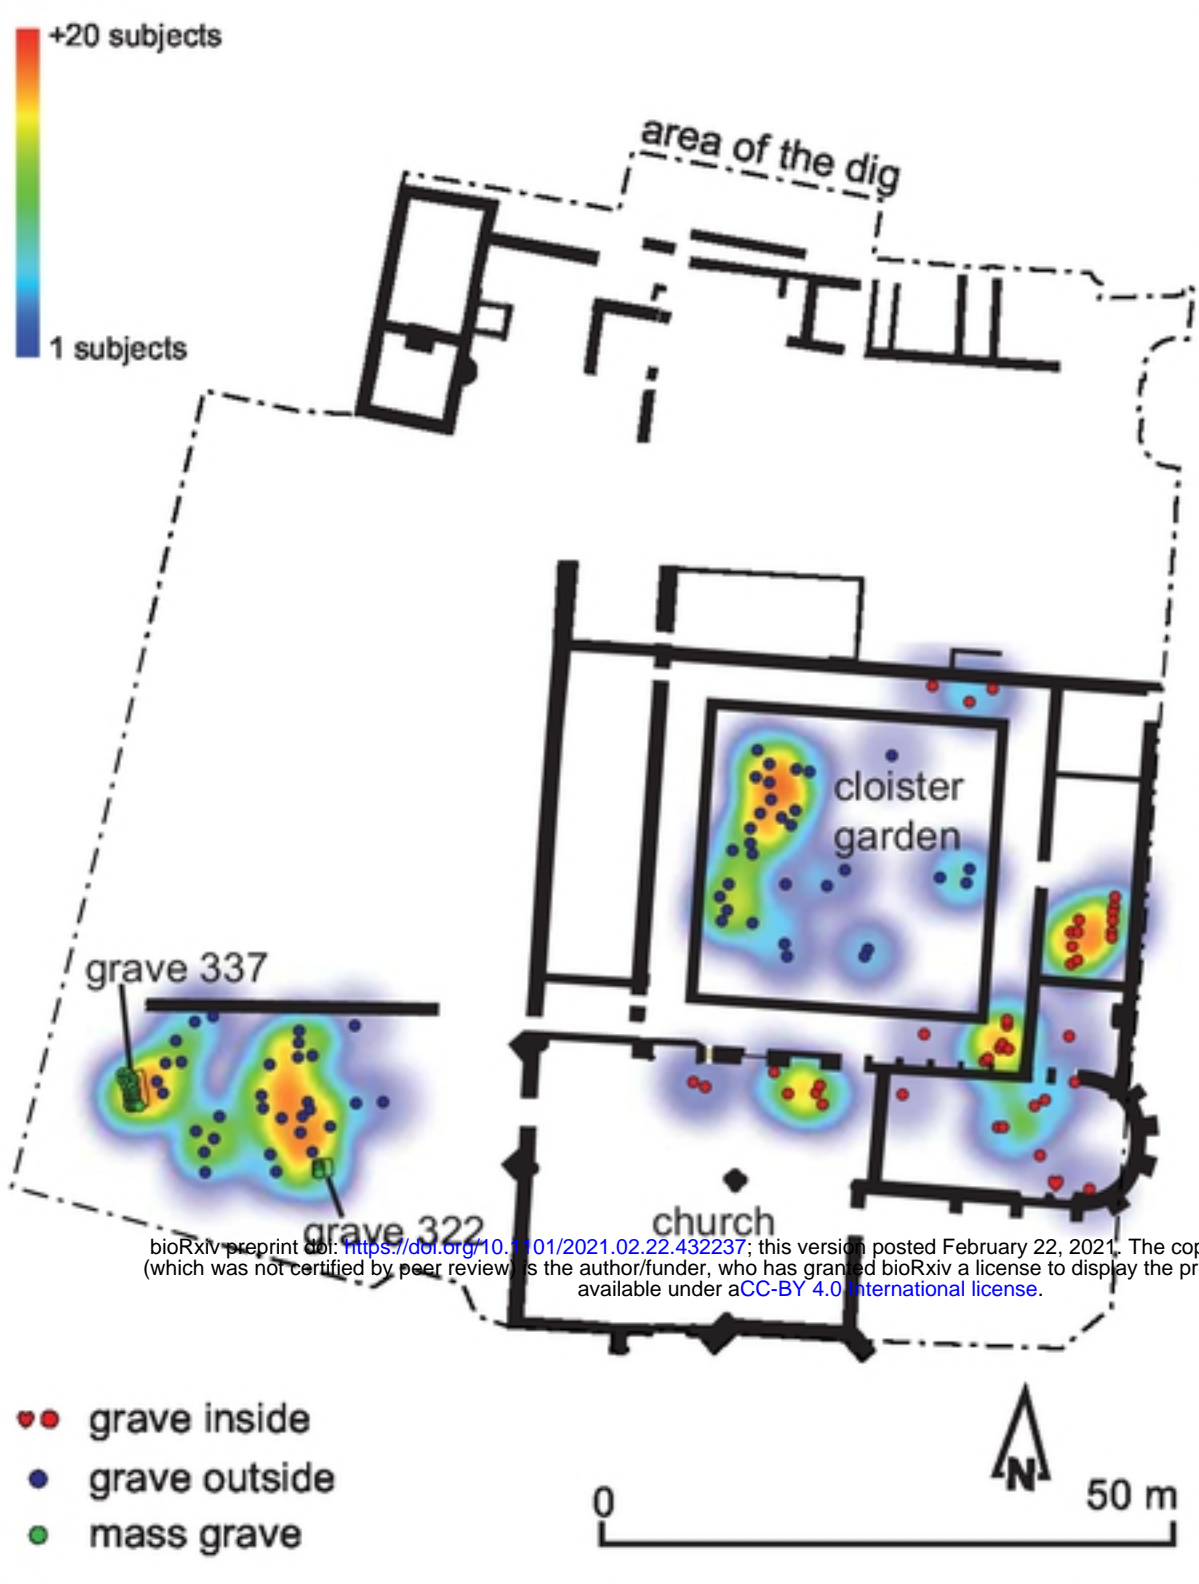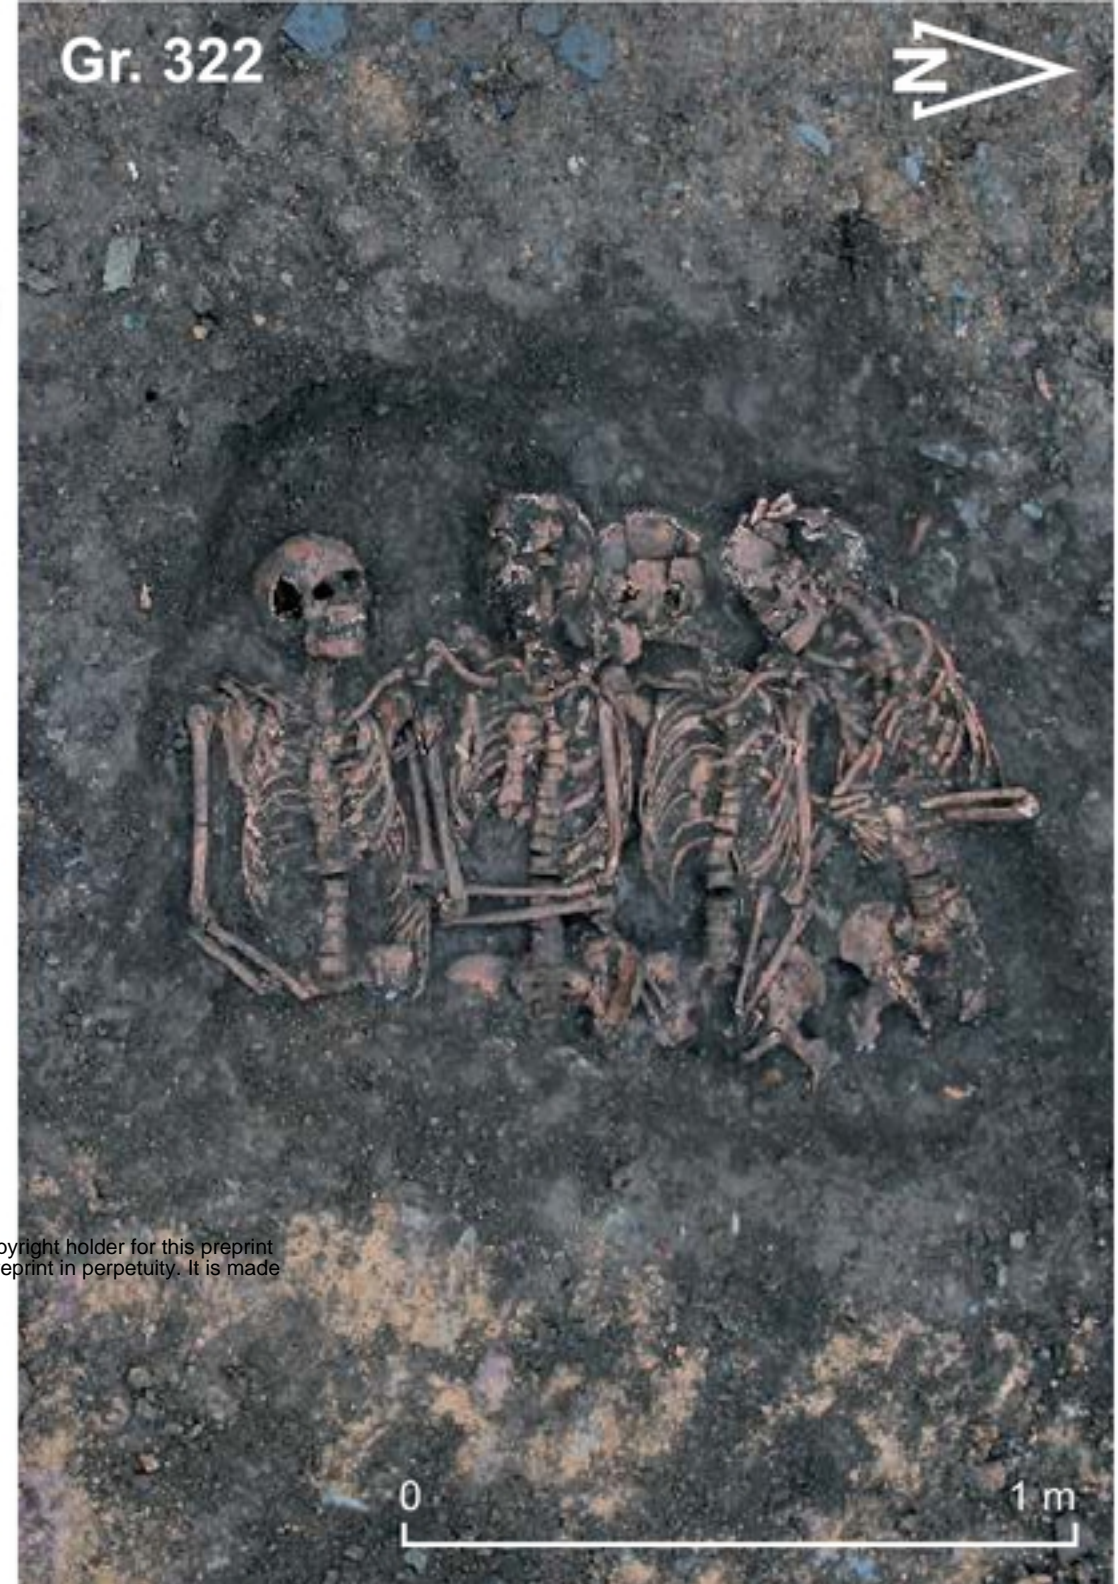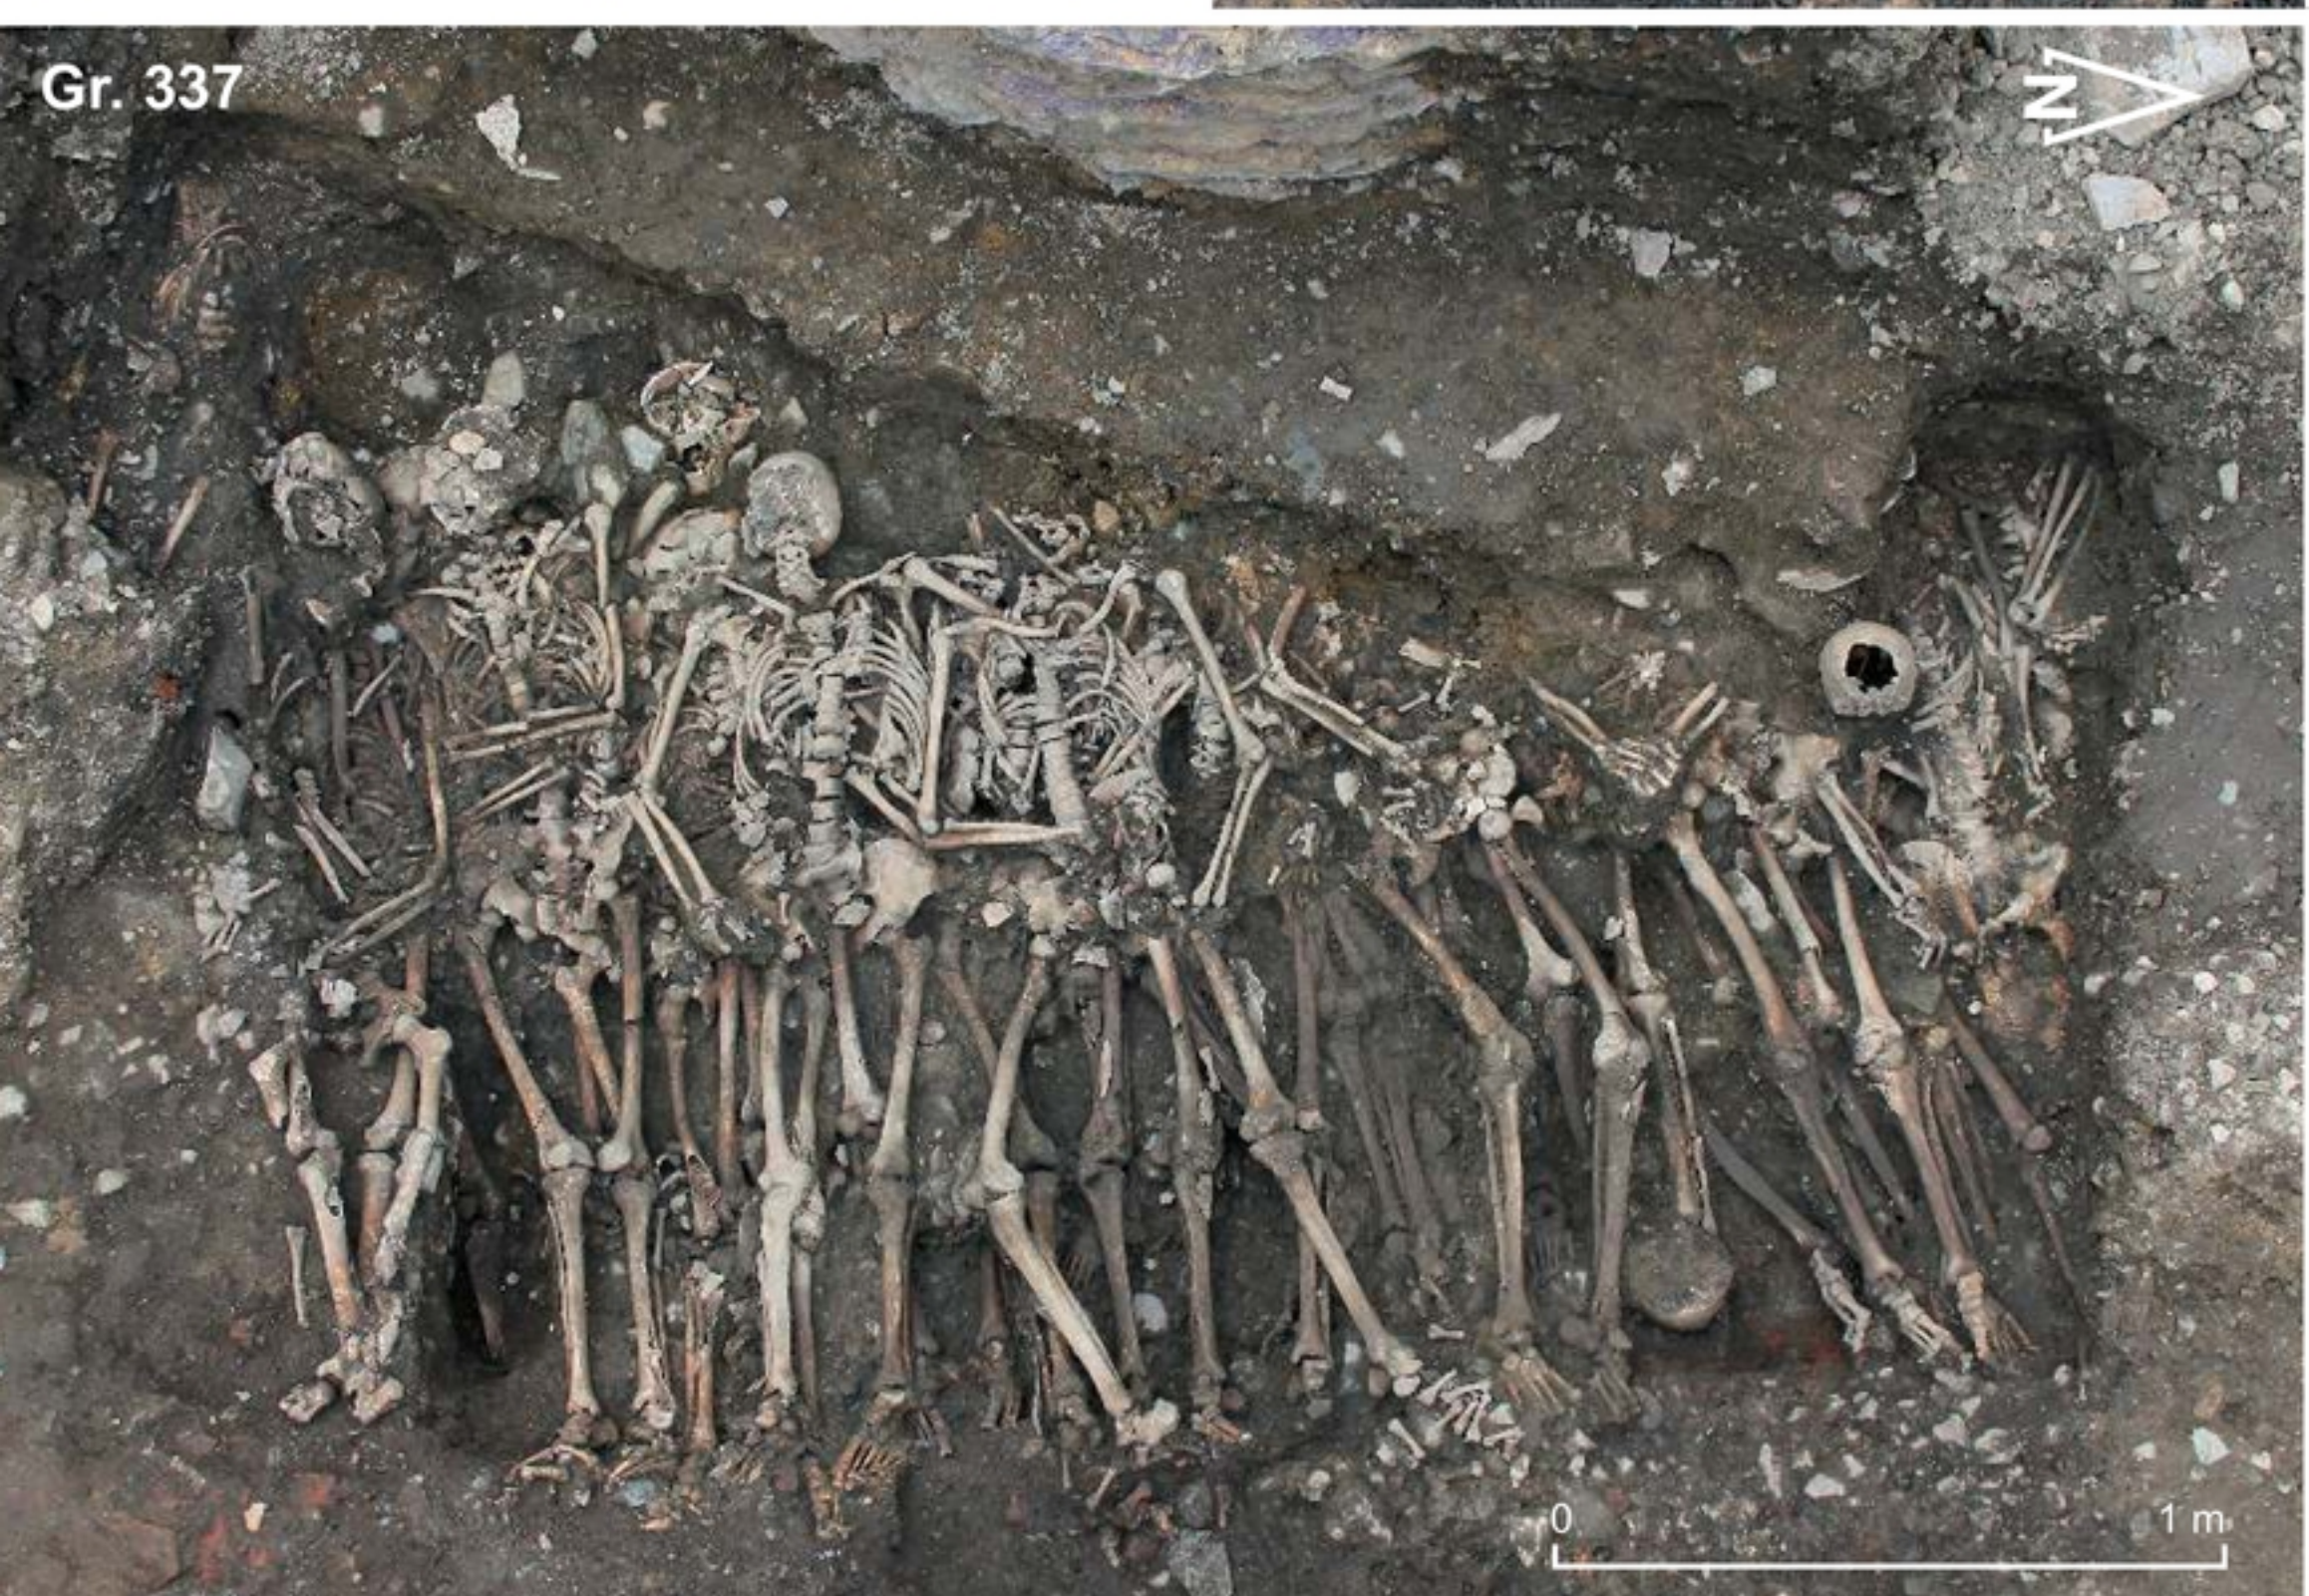

Figure 2

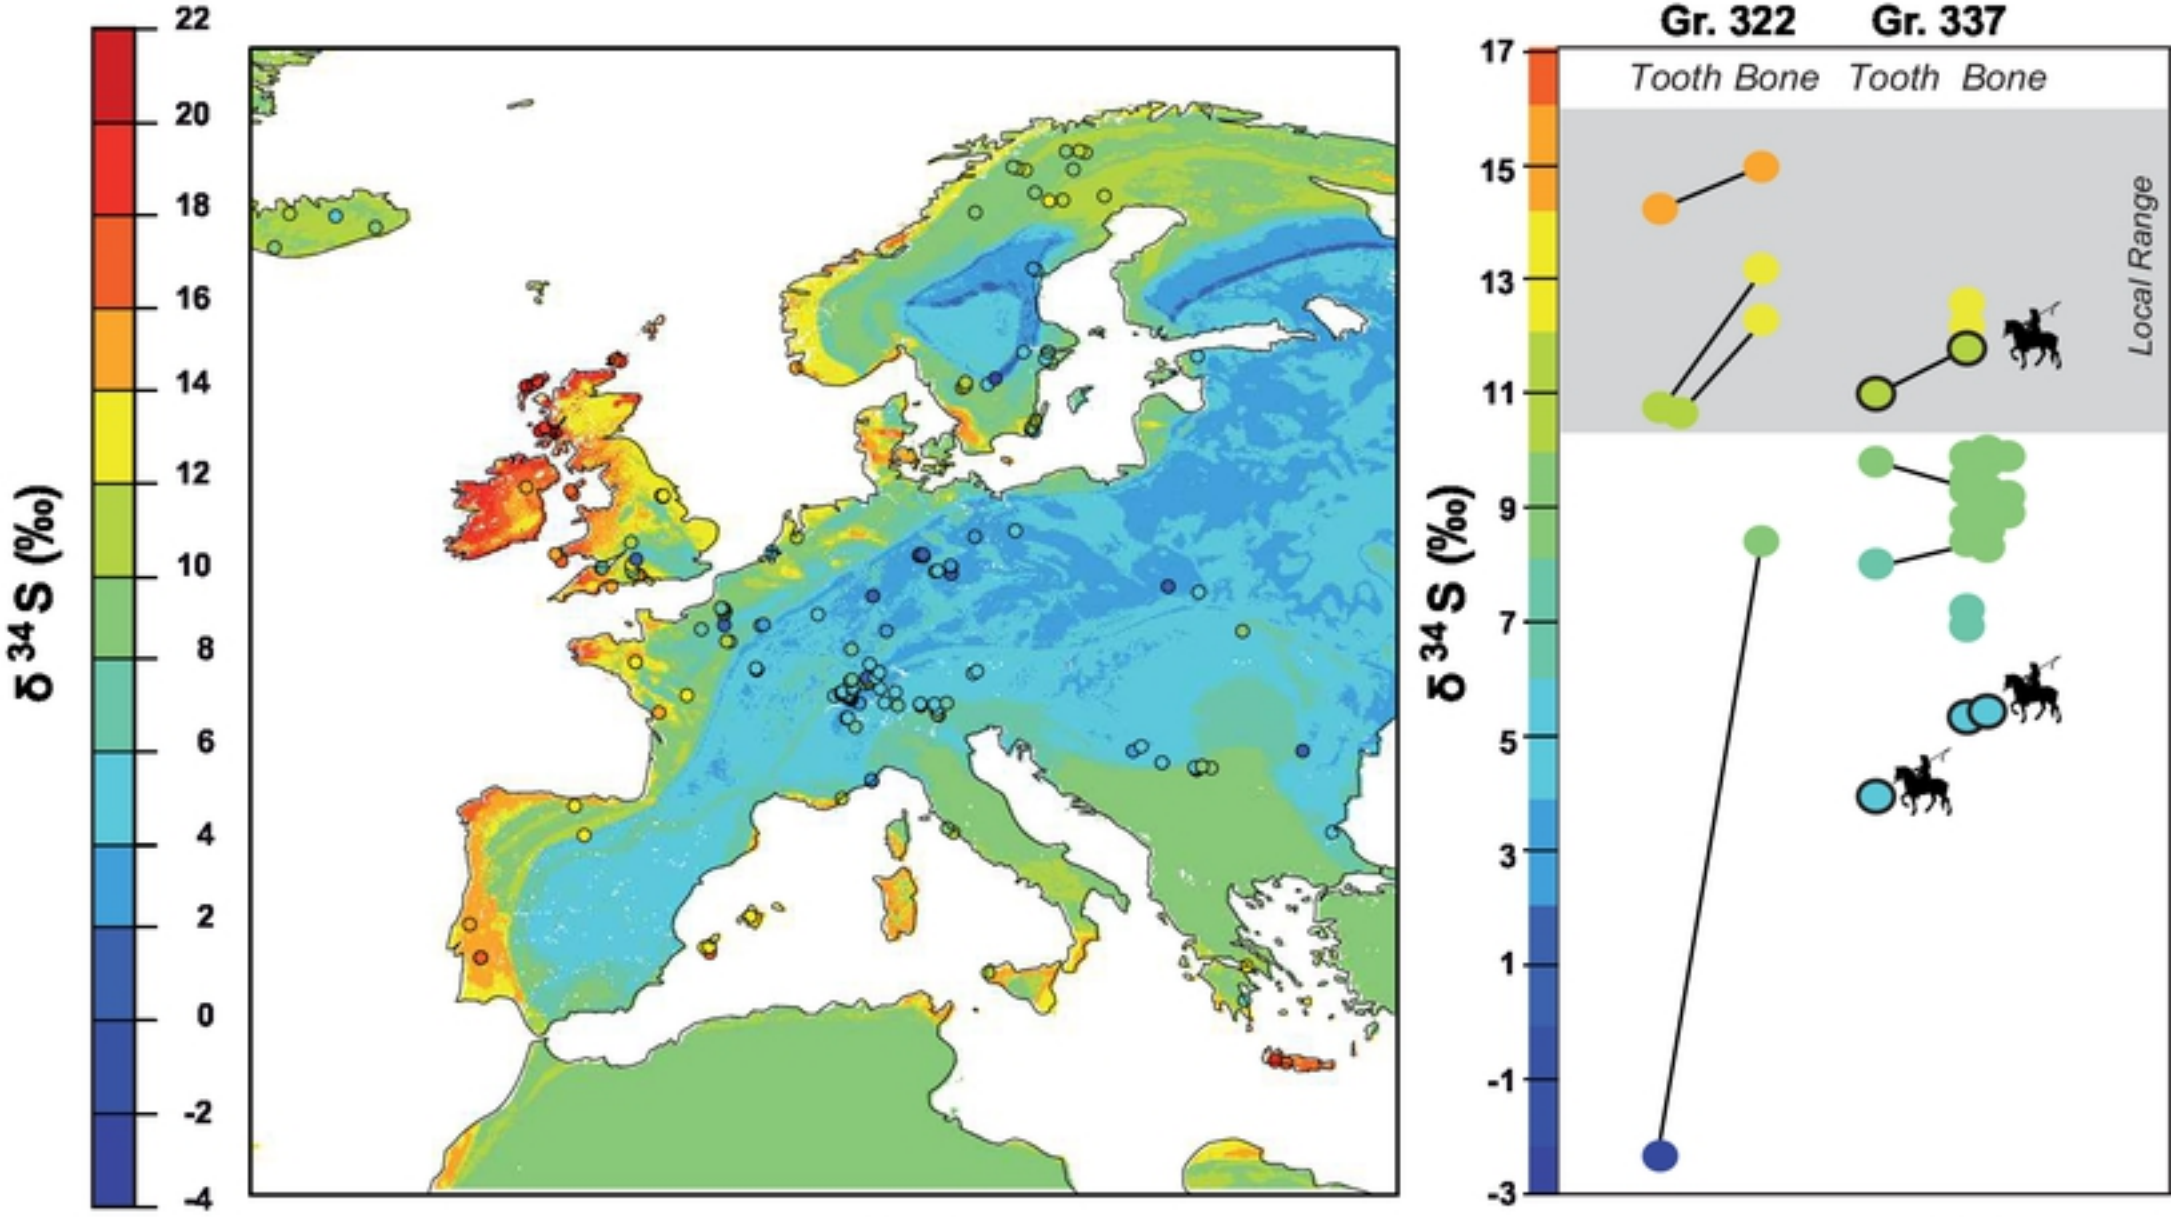

bioRxiv preprint doi: <https://doi.org/10.1101/2021.02.22.432237>; this version posted February 22, 2021. The copyright holder for this preprint (which was not certified by peer review) is the author/funder, who has granted bioRxiv a license to display the preprint in perpetuity. It is made available under aCC-BY 4.0 International license.

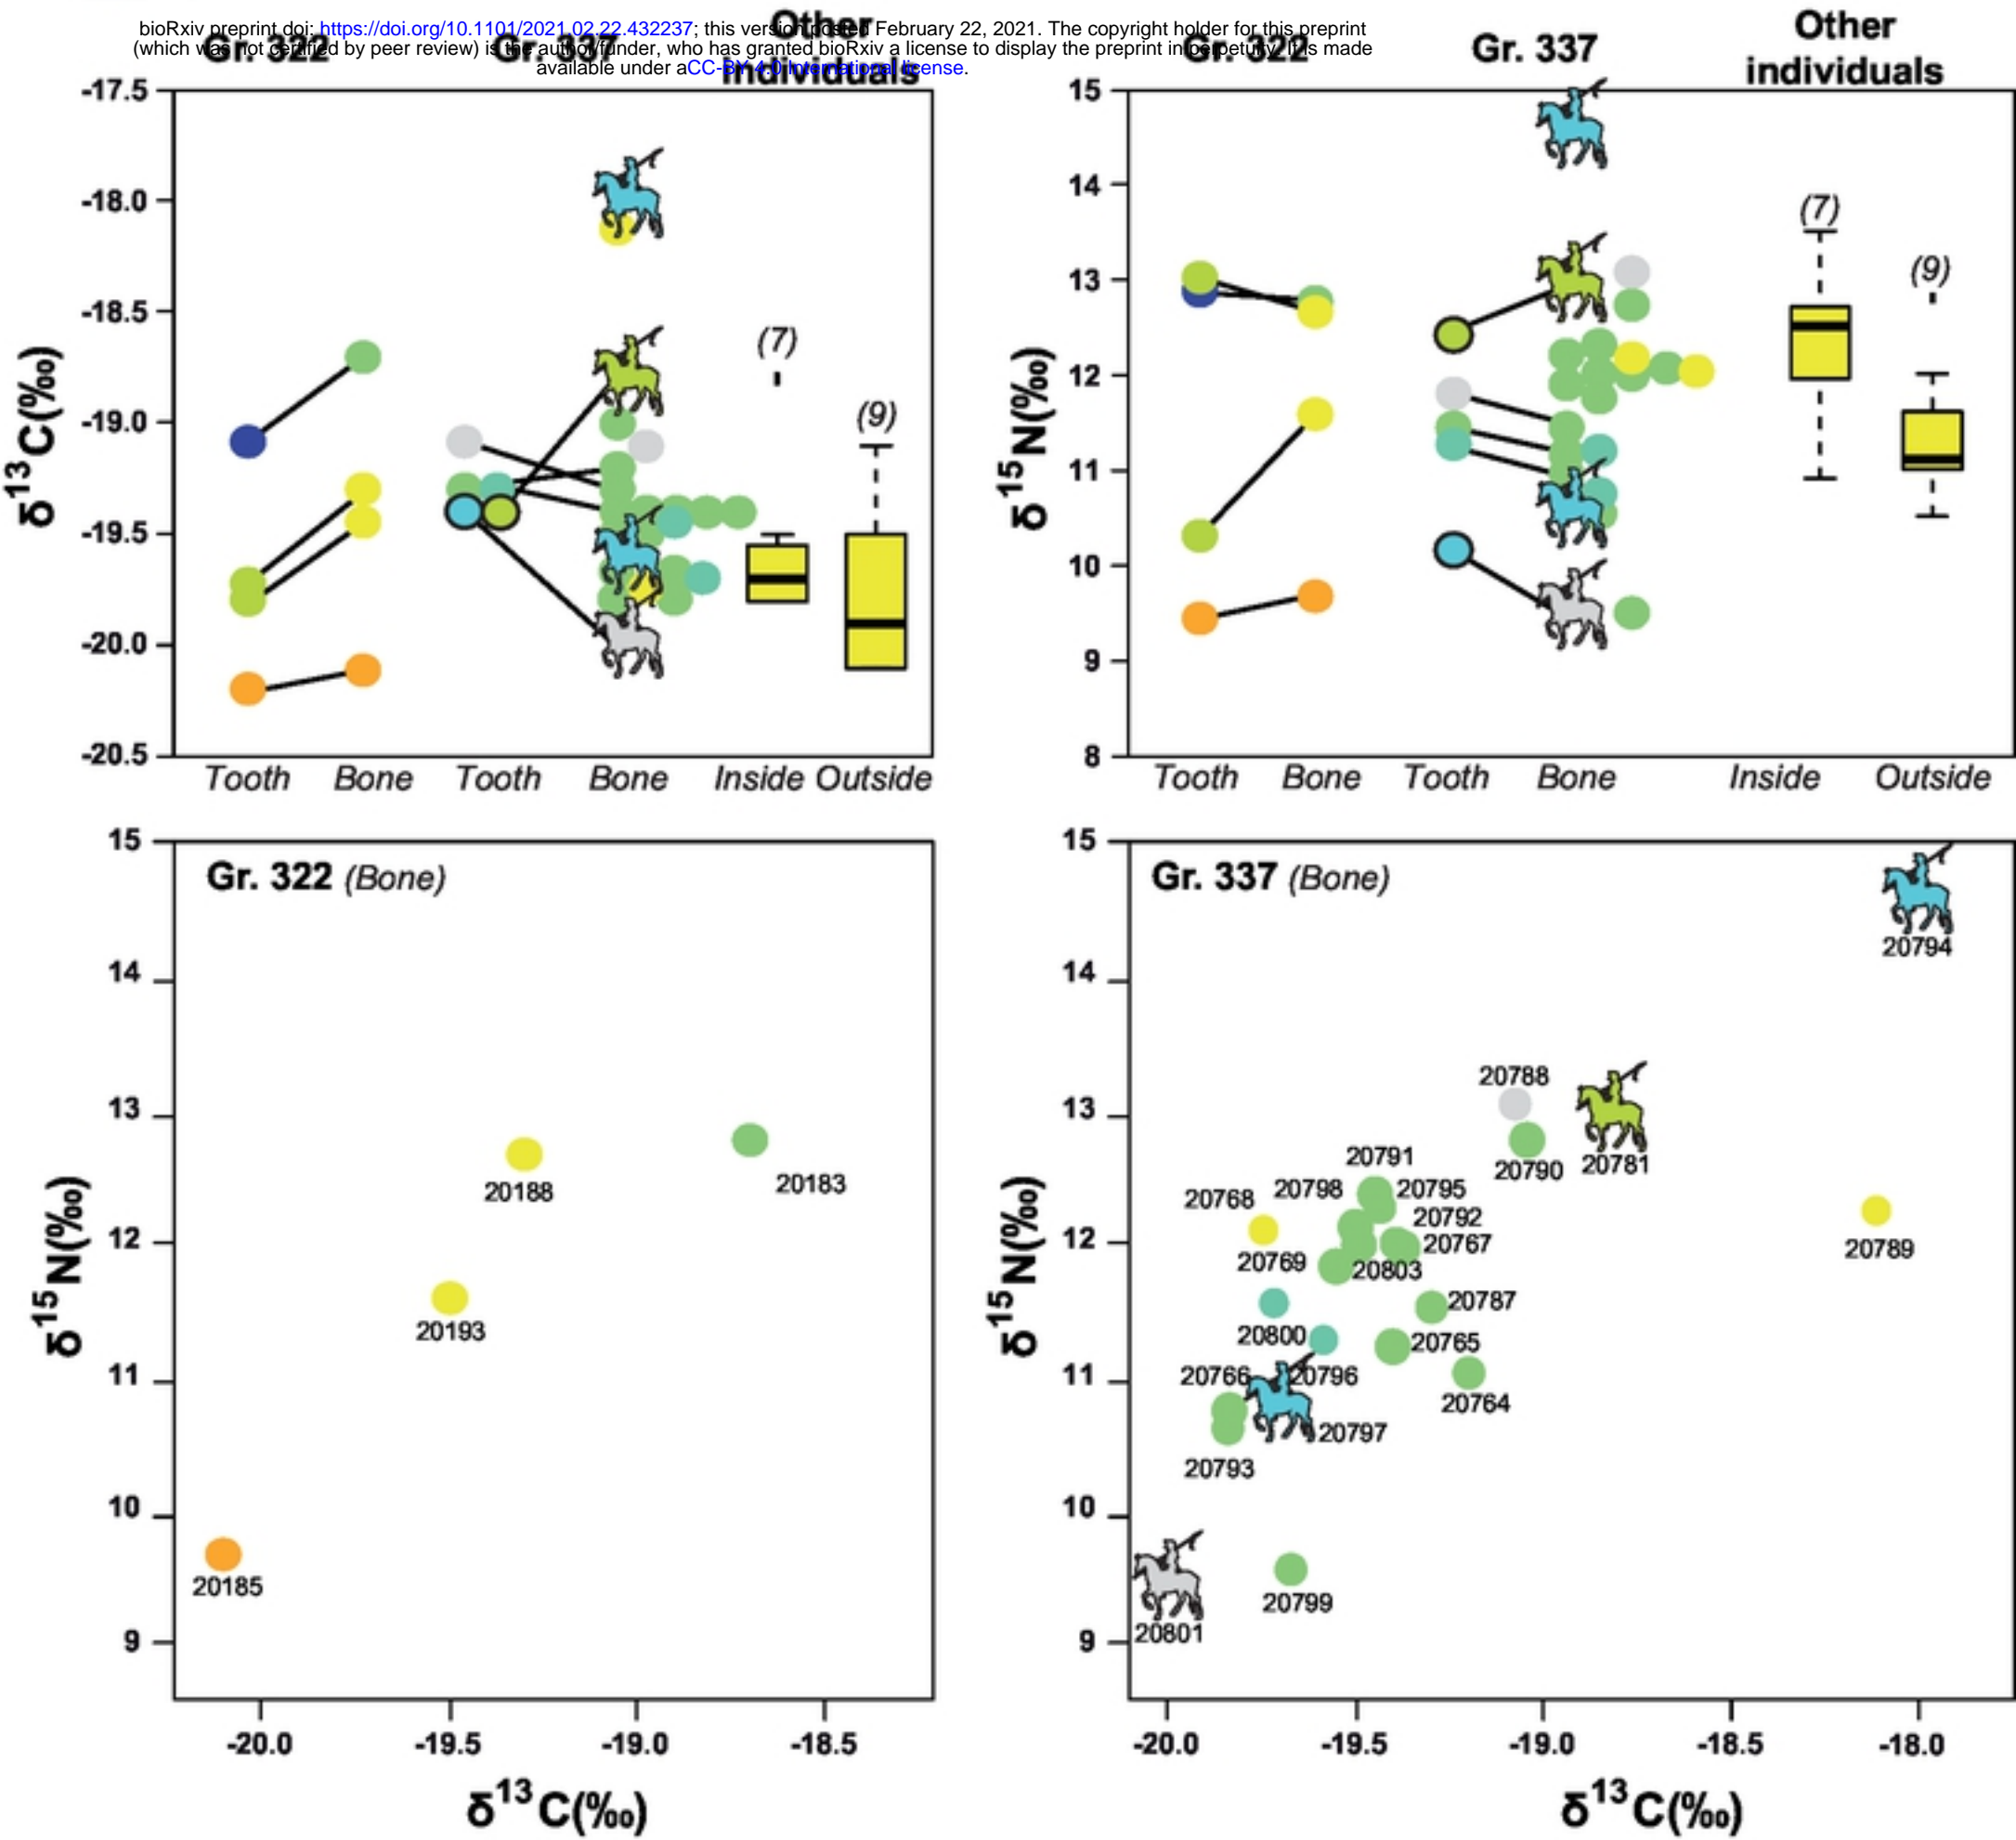

Figure 4

More coastal influence

bioRxiv preprint doi: <https://doi.org/10.1101/2021.02.22.432237>; this version posted February 22, 2021. The copyright holder for this preprint (which was not certified by peer review) is the author/funder, who has granted bioRxiv a license to display the preprint in perpetuity. It is made available under aCC-BY 4.0 International license.

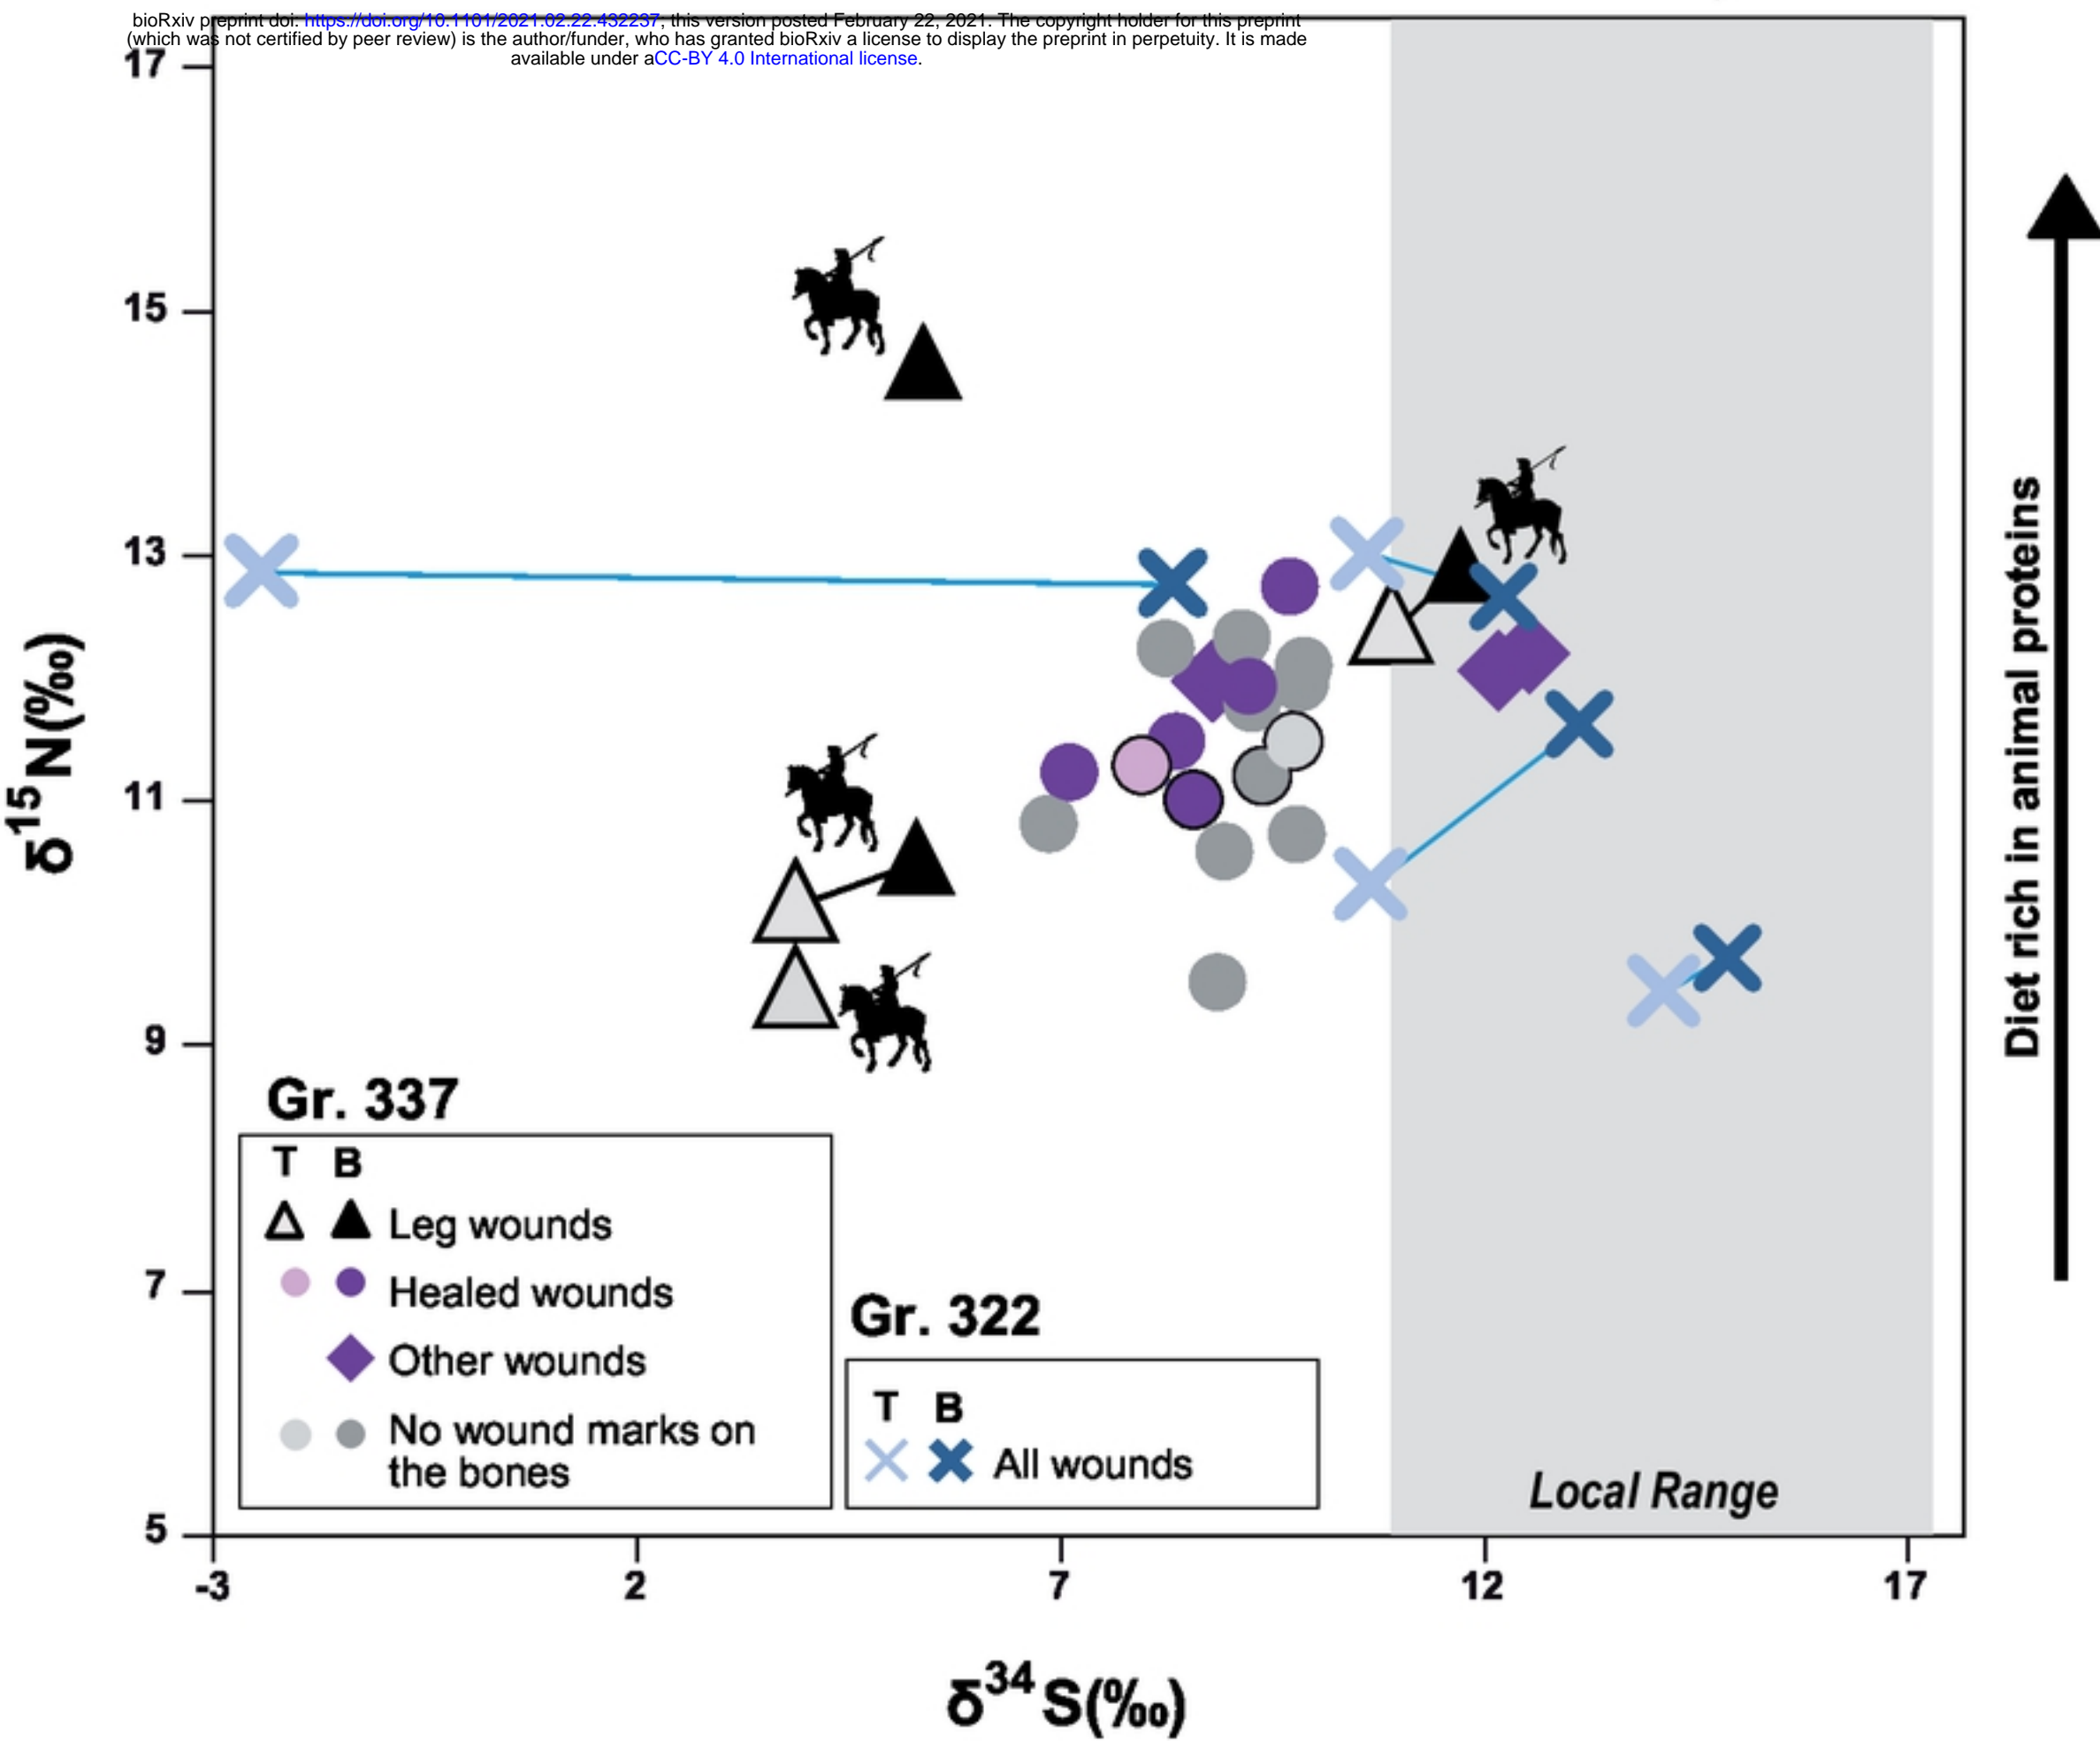

Figure 5

Based on Sr, S and O isotopes

Based on Sr and O isotopes

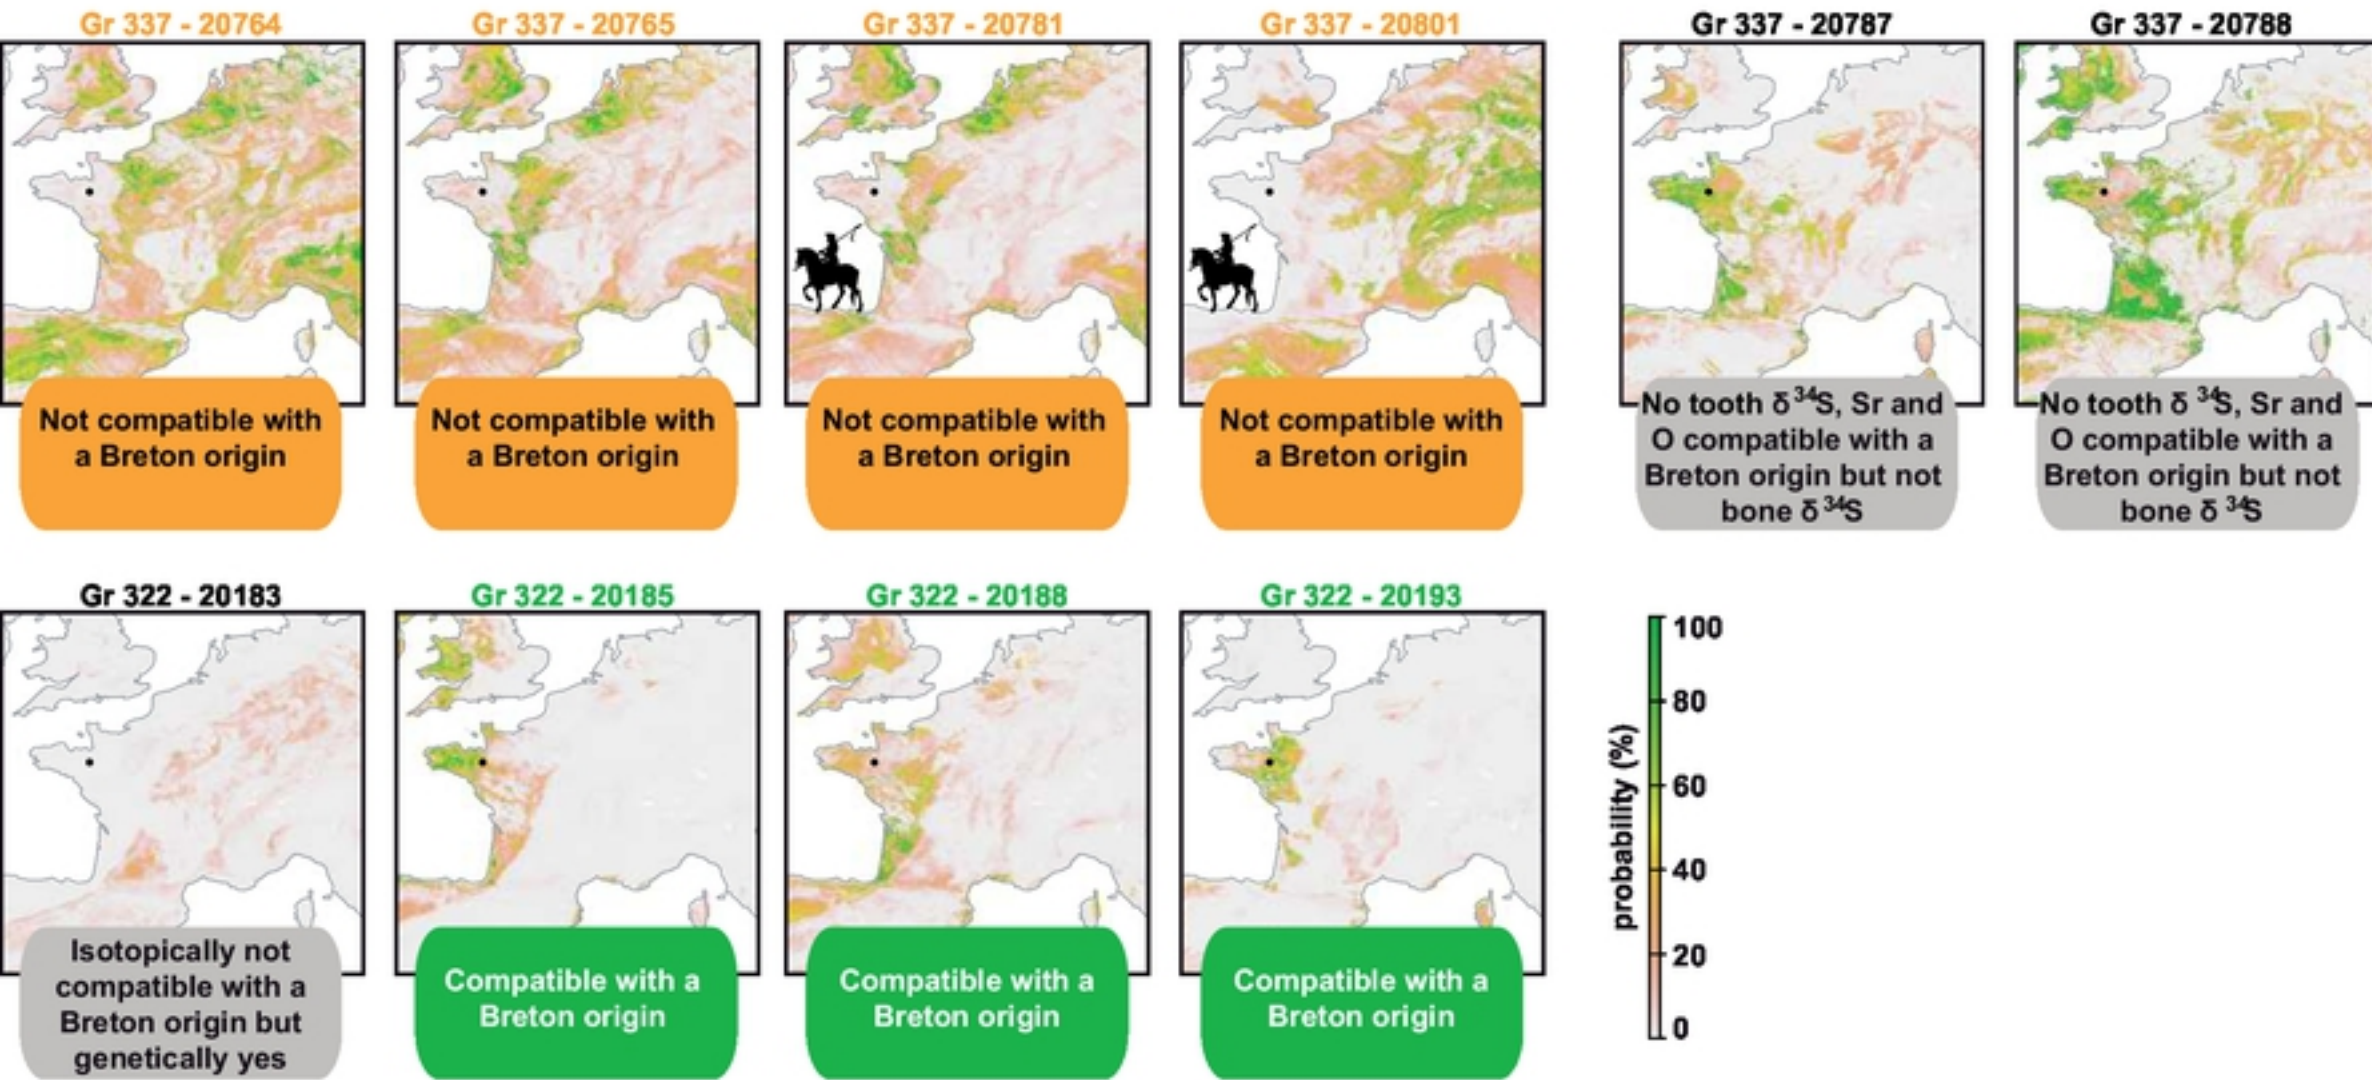

Figure 6

# Based on $\delta^{34}\text{S}$ isotope

Gr 322 - All group

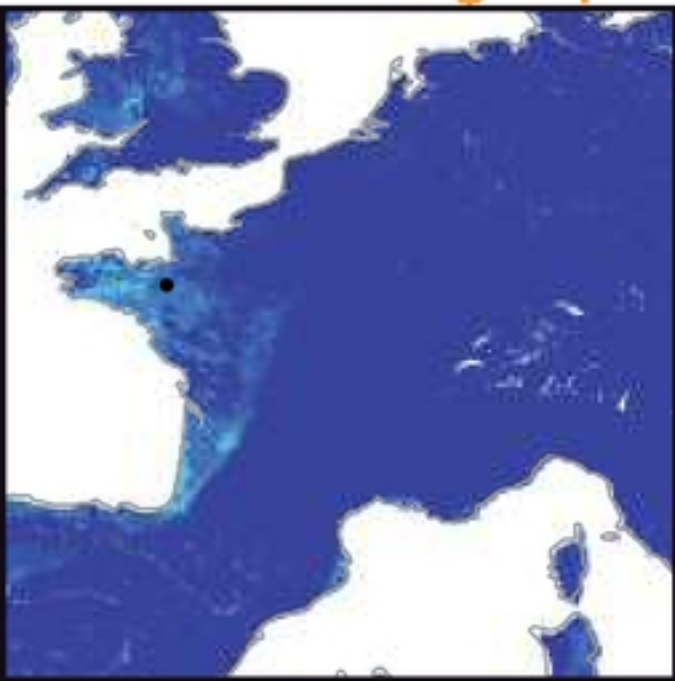

Gr 337 - Rider

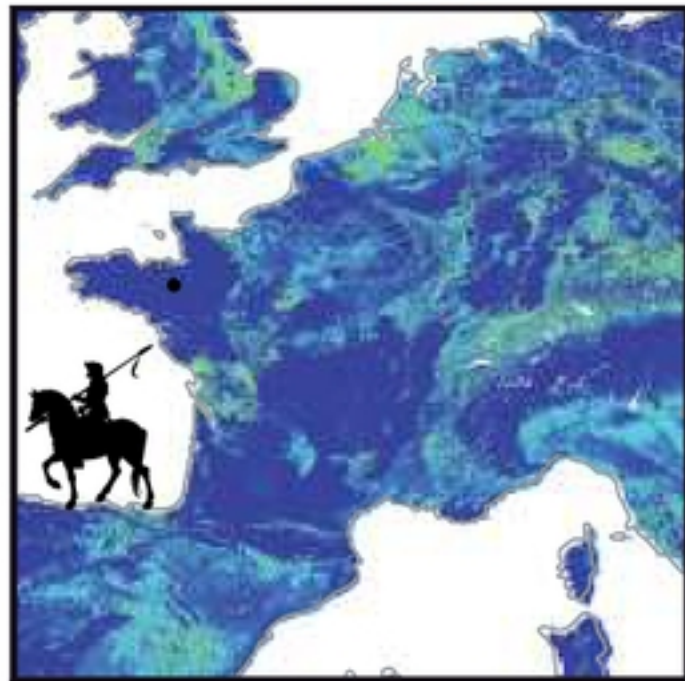

Gr 337 - Other

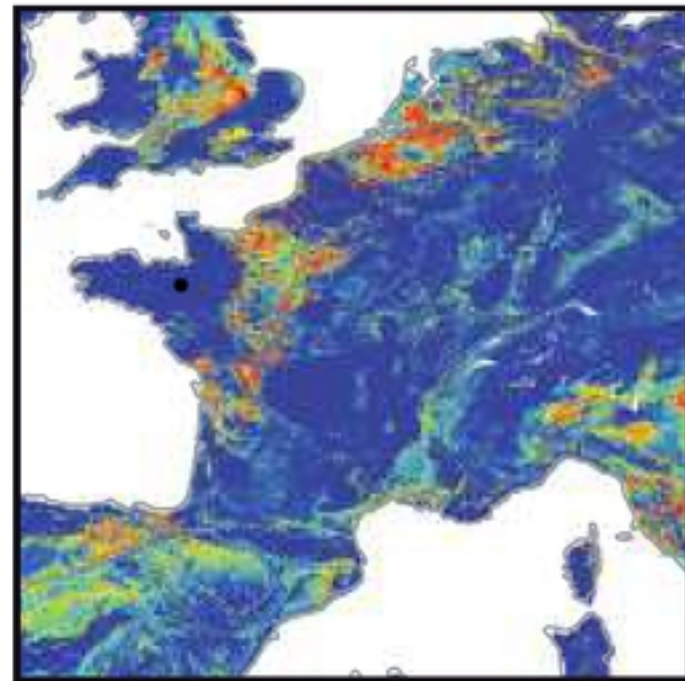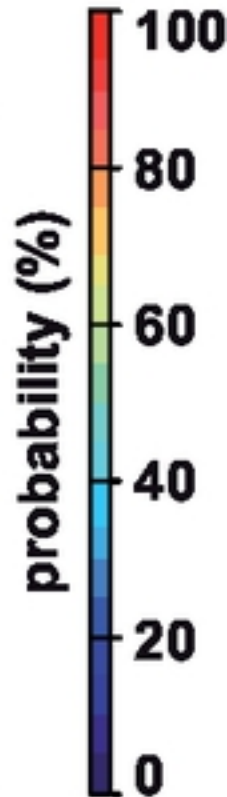

Figure 7

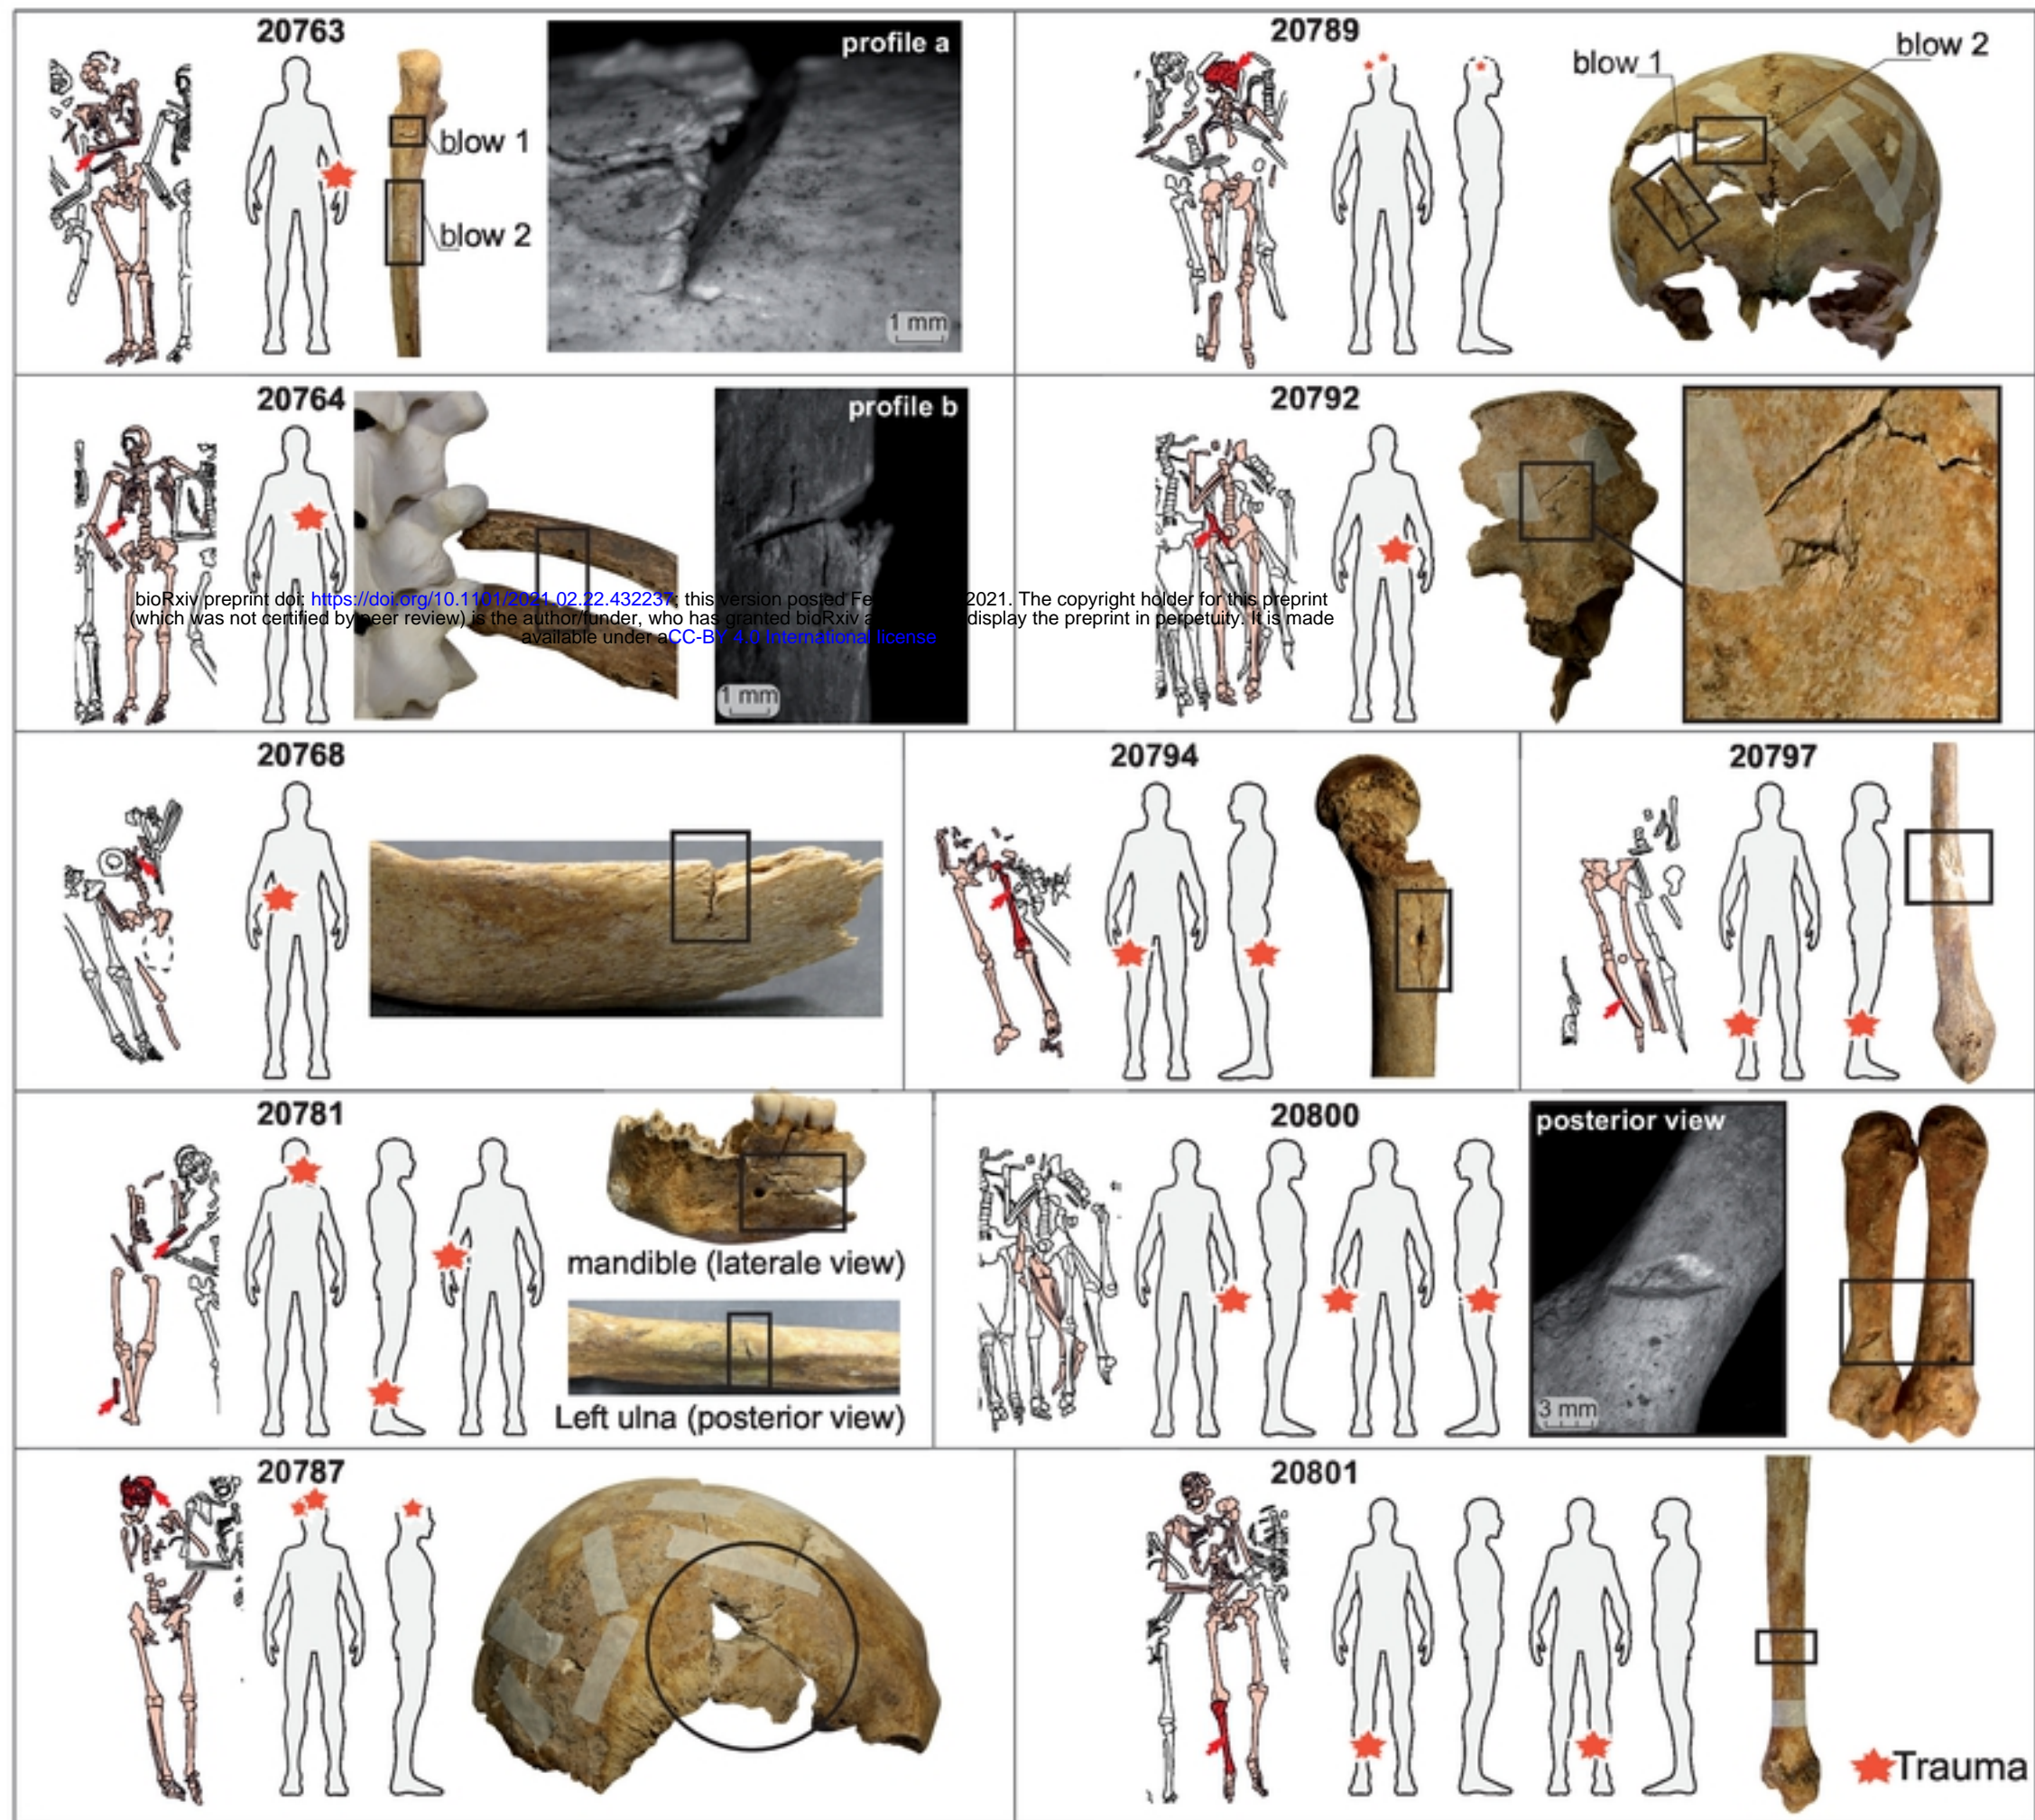

Figure 3
